# Supplementary material
Source: publisher figshare collection journal article supplement (https://gsajournals.figshare.com/ndownloader/files/22247607)
Supplement: Supplementary file 1 [file 22247607]

"#Supplementary Table S4. Differentially expressed genes in myc2/3/4 at 1h treatment between high and low R/FR conditions within genotype, and between Col and myc2/3/4 at P < 0.05.",,,,,,,,,
,gene_id,logFC.gtmyc234,logFC.gtmyc234.trtL,logCPM,LR,PValue,FDR,description,name
1,AT3G01345,-10.1702639,1.581171598,6.741325247,3576.226668,0,0, Expressed protein ,NA
2,AT4G31500,-5.317605171,-1.471892351,4.68266934,731.6064435,1.36E-159,1.18E-155," cytochrome P450, family 83, subfamily B, polypeptide 1 ",ATR4;CYP83B1;RED1;RNT1;SUR2
3,AT1G16410,-6.481265674,0.032013626,6.05913748,604.1059816,6.61E-132,3.82E-128, cytochrome p450 79f1 ,BUS1;CYP79F1;SPS1
4,AT2G30860,-3.268415093,-0.153142525,8.292784995,584.8673454,9.95E-128,4.31E-124, glutathione S-transferase PHI 9 ,ATGSTF7;ATGSTF9;GLUTTR;GSTF9
5,AT3G19710,-6.709476183,0.479632689,5.487611254,559.3815311,3.40E-122,1.18E-118, branched-chain aminotransferase4 ,BCAT4
6,AT3G02020,-6.241905016,-0.813352644,4.878393341,528.4957042,1.73E-115,5.00E-112, aspartate kinase 3 ,AK3
7,AT3G58990,-5.350962069,-0.883109158,5.033173783,488.4187767,8.73E-107,2.16E-103, isopropylmalate isomerase 1 ,IPMI1
8,AT5G14200,-4.205209897,0.160849467,6.079041747,453.97841,2.63E-99,5.70E-96, isopropylmalate dehydrogenase 1 ,ATIMD1;IMD1
9,AT4G39940,-5.150398483,-0.198891675,4.761859345,423.7900079,9.44E-93,1.82E-89, APS-kinase 2 ,AKN2;APK2
10,AT2G43100,-4.983881926,-0.443407515,6.160848049,417.7052975,1.98E-91,3.43E-88, isopropylmalate isomerase 2 ,ATLEUD1;IPMI2
11,AT1G24100,-2.360811974,-0.106576529,7.782620567,405.2008259,1.03E-88,1.62E-85, UDP-glucosyl transferase 74B1 ,UGT74B1
12,AT2G25450,-2.727000448,-0.538658124,6.251687104,369.1343196,6.97E-81,1.01E-77, 2-oxoglutarate (2OG) and Fe(II)-dependent oxygenase superfamily protein ,NA
13,AT4G13770,-3.940820497,-0.119603522,5.58915267,367.3731668,1.68E-80,2.24E-77," cytochrome P450, family 83, subfamily A, polypeptide 1 ",CYP83A1;REF2
14,AT1G18590,-4.283940593,-0.85232279,4.409534374,306.4228989,2.89E-67,3.58E-64, sulfotransferase 17 ,ATSOT17;ATST5C;SOT17
15,AT2G14750,-2.011648899,-0.201535744,5.595608823,295.4994102,6.81E-65,7.87E-62, APS kinase ,AKN1;APK;APK1;ATAKN1
16,AT3G54600,-3.307226704,-0.573612899,4.804689404,281.1908162,8.71E-62,9.44E-59, Class I glutamine amidotransferase-like superfamily protein ,DJ-1f;DJ1F
17,AT4G04610,-3.212046815,-0.048421624,5.401931278,271.0874959,1.36E-59,1.39E-56, APS reductase 1 ,APR;APR1;ATAPR1;PRH19
18,AT2G46650,-4.484291509,-0.22724818,2.952948603,250.4262934,4.17E-55,4.02E-52, cytochrome B5 isoform C ,ATCB5-C;B5 #1;CB5-C;CYTB5-C
19,AT3G22740,-8.256021825,1.317771757,3.135115232,221.9531502,6.36E-49,5.80E-46, homocysteine S-methyltransferase 3 ,HMT3
20,AT1G74090,-1.993863395,-0.076538155,6.311456223,219.4236926,2.25E-48,1.95E-45, desulfo-glucosinolate sulfotransferase 18 ,ATSOT18;ATST5B;SOT18
21,AT1G62560,-3.07830573,-0.026324815,3.772086197,202.8656521,8.88E-45,7.33E-42, flavin-monooxygenase glucosinolate S-oxygenase 3 ,FMO GS-OX3
22,AT4G12030,-4.087100446,0.741877843,3.823250532,201.5501675,1.71E-44,1.35E-41, bile acid transporter 5 ,BASS5;BAT5
23,AT1G78370,-1.818184761,-0.303768819,7.806047993,200.3905477,3.06E-44,2.31E-41, glutathione S-transferase TAU 20 ,ATGSTU20;GSTU20
24,AT1G18710,2.660926188,-0.685672656,3.971816951,199.0720769,5.92E-44,4.27E-41, myb domain protein 47 ,AtMYB47;MYB47
25,AT4G03060,-2.561825793,-0.576340339,4.4818643,191.4320004,2.70E-42,1.87E-39," AOP2 (ALKENYL HYDROXALKYL PRODUCING 2); oxidoreductase, acting on paired donors, with incorporation or reduction of molecular oxygen, 2-oxoglutarate as one donor, and incorporation of one atom each of oxygen into both donors ",AOP2
26,AT1G74100,-1.562526646,-0.409489303,5.751587895,191.0648676,3.24E-42,2.16E-39, sulfotransferase 16 ,ATSOT16;ATST5A;CORI-7;SOT16
27,AT3G26460,2.872672753,0.865643898,2.468056331,186.100423,3.88E-41,2.49E-38, Polyketide cyclase/dehydrase and lipid transport superfamily protein ,NA
28,AT4G14040,-2.030772783,0.185982751,5.386523606,181.8352427,3.27E-40,2.03E-37, selenium-binding protein 2 ,EDA38;SBP2
29,AT2G22330,-4.638263765,-0.435623603,2.863536122,179.7777335,9.16E-40,5.47E-37," cytochrome P450, family 79, subfamily B, polypeptide 3 ",CYP79B3
30,AT5G35935,5.227502613,-0.809064326,2.672055574,177.4544828,2.93E-39,1.69E-36, transposable element gene ,NA
31,AT5G23010,-2.948280088,-0.389773706,6.282281062,175.1402002,9.31E-39,5.20E-36, methylthioalkylmalate synthase 1 ,GSM1;IMS3;MAM1
32,AT3G22210,-1.350157562,0.102694775,6.667699074,159.9749042,1.83E-35,9.90E-33, unknown protein; FUNCTIONS IN: molecular_function unknown; INVOLVED IN: biological_process unknown; LOCATED IN: endomembrane system; EXPRESSED IN: 21 plant structures; EXPRESSED DURING: 13 growth stages; Has 26 Blast hits to 26 proteins in 13 species: Archae - 0; Bacteria - 0; Metazoa - 0; Fungi - 0; Plants - 26; Viruses - 0; Other Eukaryotes - 0 (source: NCBI BLink). ,NA
33,AT4G39950,-4.032444986,-0.737294643,2.555220561,159.8138143,1.98E-35,1.04E-32," cytochrome P450, family 79, subfamily B, polypeptide 2 ",CYP79B2
34,AT1G52000,-2.385689447,-0.079853805,4.135825608,153.5305035,4.58E-34,2.34E-31, Mannose-binding lectin superfamily protein ,NA
35,AT1G52040,-3.678273077,-1.037823839,1.869018496,153.2006873,5.41E-34,2.68E-31, myrosinase-binding protein 1 ,ATMBP;MBP1
36,AT4G11320,0.960162025,-0.050191912,6.204380735,149.5302806,3.39E-33,1.63E-30, Papain family cysteine protease ,AtCP2;CP2
37,AT3G14210,1.032145114,0.120219248,7.263916586,130.2680245,5.16E-29,2.42E-26, epithiospecifier modifier 1 ,ESM1
38,AT2G20610,-1.38409445,-0.216109884,5.732804047,129.9083825,6.18E-29,2.82E-26, Tyrosine transaminase family protein ,ALF1;HLS3;RTY;RTY1;SUR1
39,AT1G65860,-3.552121477,-0.421148063,2.398839927,118.6497946,1.72E-26,7.64E-24, flavin-monooxygenase glucosinolate S-oxygenase 1 ,FMO GS-OX1
40,AT4G30530,-1.363593137,-0.439088889,5.984228305,110.3787631,1.08E-24,4.66E-22, Class I glutamine amidotransferase-like superfamily protein ,GGP1
41,AT4G21630,-6.281371539,-0.592576369,0.441703796,90.14581834,2.66E-20,1.12E-17, Subtilase family protein ,NA
42,AT5G48490,-1.968252696,0.483847969,4.78348005,88.68256936,5.53E-20,2.28E-17, Bifunctional inhibitor/lipid-transfer protein/seed storage 2S albumin superfamily protein ,DIR1-like
43,AT1G52030,-3.613222014,-0.993730646,1.631973698,81.69465232,1.82E-18,7.34E-16, myrosinase-binding protein 2 ,F-ATMBP;MBP1.2;MBP2
44,AT5G44720,-1.175616524,-0.092121028,5.397626929,79.51400531,5.42E-18,2.13E-15, Molybdenum cofactor sulfurase family protein ,NA
45,AT2G46790,1.083647266,-0.228589028,5.055352624,79.33447814,5.93E-18,2.28E-15, pseudo-response regulator 9 ,APRR9;PRR9;TL1
46,AT1G32900,1.072443973,-0.280103011,5.200433631,77.79610888,1.28E-17,4.82E-15, UDP-Glycosyltransferase superfamily protein ,GBSS1
47,AT1G14250,-2.484651369,-0.347685486,4.39893376,73.81829794,9.34E-17,3.45E-14, GDA1/CD39 nucleoside phosphatase family protein ,NA
48,AT1G72645,-1.374962018,0.386983833,4.454644397,72.13115603,2.17E-16,7.68E-14, unknown protein; FUNCTIONS IN: molecular_function unknown; INVOLVED IN: biological_process unknown; LOCATED IN: endomembrane system; Has 35333 Blast hits to 34131 proteins in 2444 species: Archae - 798; Bacteria - 22429; Metazoa - 974; Fungi - 991; Plants - 531; Viruses - 0; Other Eukaryotes - 9610 (source: NCBI BLink). ,NA
49,AT1G20390,-1.152229195,-0.147848945,4.224640317,72.13090591,2.17E-16,7.68E-14, transposable element gene ,NA
50,AT2G38860,-0.853320195,-0.475807335,4.870473243,71.49577421,2.98E-16,1.03E-13, Class I glutamine amidotransferase-like superfamily protein ,DJ-1e;DJ1E;YLS5
51,AT2G31790,-0.978733907,0.042643256,7.309767641,69.67110875,7.43E-16,2.53E-13, UDP-Glycosyltransferase superfamily protein ,NA
52,AT3G26470,4.314179193,-1.134774412,0.583929475,68.75888293,1.17E-15,3.91E-13," Powdery mildew resistance protein,  RPW8 domain ",NA
53,AT4G14680,-0.99486976,-0.677707071,3.566082935,68.57354146,1.29E-15,4.21E-13, Pseudouridine synthase/archaeosine transglycosylase-like family protein ,APS3;ATPS3
54,AT5G43500,0.971408194,-0.050518642,4.180451984,68.47822865,1.35E-15,4.33E-13, actin-related protein 9 ,ARP9;ATARP9
55,AT1G70260,1.737442326,0.004764127,2.79913232,66.24580592,4.12E-15,1.30E-12, nodulin MtN21 /EamA-like transporter family protein ,RTP1;UMAMIT36
56,AT3G28220,-0.73668332,-0.392209699,5.481539558,66.19158453,4.23E-15,1.31E-12, TRAF-like family protein ,NA
57,AT2G43530,-1.933927865,0.609858474,2.868251446,64.88230194,8.15E-15,2.48E-12, Scorpion toxin-like knottin superfamily protein ,NA
58,AT4G17880,-1.085437688,-0.155096339,4.069666057,64.29616401,1.09E-14,3.26E-12, Basic helix-loop-helix (bHLH) DNA-binding family protein ,MYC4
59,AT5G54190,-1.916713513,0.190268545,3.28160751,64.03949422,1.24E-14,3.65E-12, protochlorophyllide oxidoreductase A ,PORA
60,AT3G23570,-1.817468539,0.263102391,2.930657138,63.84902895,1.37E-14,3.94E-12, alpha/beta-Hydrolases superfamily protein ,NA
61,AT2G15960,-1.383968194,0.570539322,5.886763621,62.30202664,2.96E-14,8.41E-12, unknown protein; Has 14 Blast hits to 14 proteins in 5 species: Archae - 0; Bacteria - 0; Metazoa - 0; Fungi - 0; Plants - 14; Viruses - 0; Other Eukaryotes - 0 (source: NCBI BLink). ,NA
62,AT5G42250,-1.51896836,0.121061055,3.821036257,61.38638591,4.68E-14,1.31E-11, Zinc-binding alcohol dehydrogenase family protein ,NA
63,AT2G29450,-0.734991187,0.167445208,7.486429734,59.31362023,1.32E-13,3.63E-11, glutathione S-transferase tau  5 ,AT103-1A;ATGSTU1;ATGSTU5;GSTU5
64,AT1G22340,-3.779337175,-2.520166473,1.030544077,57.97039235,2.58E-13,6.99E-11, UDP-glucosyl transferase 85A7 ,AtUGT85A7;UGT85A7
65,AT5G60100,-1.054364969,0.10850634,4.803766692,57.58592818,3.13E-13,8.34E-11, pseudo-response regulator 3 ,APRR3;PRR3
66,AT3G16400,0.802036282,-0.247138728,6.474083709,57.08639258,4.02E-13,1.05E-10, nitrile specifier protein 1 ,ATMLP-470;ATNSP1;NSP1
67,AT5G07700,-2.953840874,-0.17785636,1.367523704,53.8202773,2.06E-12,5.32E-10, myb domain protein 76 ,AtMYB76;MYB76
68,AT4G16146,-1.309875422,0.338648934,4.146579232,53.2265432,2.77E-12,6.97E-10, cAMP-regulated phosphoprotein 19-related protein ,NA
69,AT4G34400,1.960757231,-0.731364128,2.571540146,53.2210483,2.77E-12,6.97E-10, AP2/B3-like transcriptional factor family protein ,NA
70,AT2G14660,-1.040474465,0.386400347,5.528612924,52.43716225,4.11E-12,1.02E-09, unknown protein; CONTAINS InterPro DOMAIN/s: Uncharacterised protein family UPF0310 (InterPro:IPR002740); Has 2761 Blast hits to 2761 proteins in 686 species: Archae - 5; Bacteria - 1143; Metazoa - 73; Fungi - 78; Plants - 42; Viruses - 0; Other Eukaryotes - 1420 (source: NCBI BLink). ,NA
71,AT1G09415,-1.095764451,0.437928901,5.554680605,51.96790258,5.19E-12,1.27E-09, NIM1-interacting 3 ,NIMIN-3
72,AT2G46830,1.191204986,-0.176855536,4.370257943,51.17090892,7.73E-12,1.86E-09, circadian clock associated 1 ,AtCCA1;CCA1
73,AT1G52410,-0.66535246,-0.417448148,4.721856167,50.66473975,9.96E-12,2.36E-09, TSK-associating protein 1 ,AtTSA1;TSA1
74,AT3G22840,-1.510714718,-0.347804485,2.816623451,50.44953755,1.11E-11,2.60E-09, Chlorophyll A-B binding family protein ,ELIP;ELIP1
75,AT5G35740,-1.055083983,0.118459656,3.649004969,50.24446424,1.23E-11,2.84E-09, Carbohydrate-binding X8 domain superfamily protein ,NA
76,AT3G63160,-1.031232481,0.283752084,8.391413935,50.1278433,1.30E-11,2.97E-09," FUNCTIONS IN: molecular_function unknown; INVOLVED IN: biological_process unknown; LOCATED IN: chloroplast outer membrane, thylakoid, chloroplast thylakoid membrane, chloroplast, chloroplast envelope; EXPRESSED IN: 21 plant structures; EXPRESSED DURING: 13 growth stages; BEST Arabidopsis thaliana protein match is: outer envelope membrane protein 7 (TAIR:AT3G52420.1); Has 26 Blast hits to 26 proteins in 8 species: Archae - 0; Bacteria - 0; Metazoa - 0; Fungi - 0; Plants - 26; Viruses - 0; Other Eukaryotes - 0 (source: NCBI BLink). ",OEP6
77,AT5G06870,-0.95025577,-0.578319559,3.369721395,49.77628441,1.55E-11,3.50E-09, polygalacturonase inhibiting protein 2 ,ATPGIP2;PGIP2
78,AT5G01500,-0.850826298,-0.199549554,3.813569721,49.15519855,2.12E-11,4.70E-09, thylakoid ATP/ADP carrier ,TAAC
79,AT5G47720,0.726776134,0.093531478,3.842888299,49.13434397,2.14E-11,4.70E-09, Thiolase family protein ,AACT1
80,AT2G41650,-0.9966572,0.340748485,5.245261206,49.00757059,2.28E-11,4.94E-09, unknown protein; FUNCTIONS IN: molecular_function unknown; INVOLVED IN: biological_process unknown; LOCATED IN: chloroplast; EXPRESSED IN: 22 plant structures; EXPRESSED DURING: 13 growth stages; Has 3 Blast hits to 3 proteins in 1 species: Archae - 0; Bacteria - 0; Metazoa - 0; Fungi - 0; Plants - 3; Viruses - 0; Other Eukaryotes - 0 (source: NCBI BLink). ,NA
81,AT5G54390,-0.744607688,0.053548222,5.743542881,48.97329682,2.32E-11,4.96E-09, HAL2-like ,AHL;ATAHL;HL
82,AT3G09260,0.836281502,-0.190836699,5.798752246,47.77383213,4.23E-11,8.93E-09, Glycosyl hydrolase superfamily protein ,BGLU23;LEB;PSR3.1;PYK10
83,AT3G22890,-0.578088553,-0.273836045,6.034104955,47.36909223,5.18E-11,1.08E-08, ATP sulfurylase 1 ,APS1;ATPS1
84,AT3G03190,-3.247359634,1.028475704,1.428163608,47.086703,5.96E-11,1.23E-08, glutathione S-transferase F11 ,ATGSTF11;ATGSTF6;GSTF11
85,AT5G07460,-1.1868054,-0.741203217,2.824393219,46.9748232,6.30E-11,1.28E-08, peptidemethionine sulfoxide reductase 2 ,ATMSRA2;PMSR2
86,AT1G04770,-1.05382942,-0.079256314,4.069688523,46.79659176,6.89E-11,1.38E-08, Tetratricopeptide repeat (TPR)-like superfamily protein ,SD!2
87,AT3G15950,0.87175334,-0.197019387,4.77838613,46.7889295,6.92E-11,1.38E-08, DNA topoisomerase-related ,NAI2
88,AT2G43910,-0.647473755,0.16889942,5.620643963,46.59612372,7.62E-11,1.50E-08, HARMLESS TO OZONE LAYER 1 ,ATHOL1;HOL1
89,AT5G20630,-0.519627209,0.041046544,8.142217918,44.36145113,2.33E-10,4.53E-08, germin 3 ,ATGER3;GER3;GLP3;GLP3A;GLP3B
90,AT4G01525,1.441870965,0.067573811,2.494157221,44.15012185,2.59E-10,4.98E-08, transposable element gene ,SADHU5-1
91,AT2G45660,0.887511826,-0.155287194,4.783930121,43.96130404,2.84E-10,5.42E-08, AGAMOUS-like 20 ,AGL20;ATSOC1;SOC1
92,AT4G21650,1.292924014,0.025615277,4.59257174,43.77115162,3.13E-10,5.89E-08, Subtilase family protein ,SBT3.13
93,AT2G06050,-0.73627412,0.039036671,5.177313273,43.61688787,3.38E-10,6.29E-08, oxophytodienoate-reductase 3 ,AtOPR3;DDE1;OPR3
94,AT4G04830,-2.748071126,-1.569141542,1.286864331,43.59205794,3.42E-10,6.31E-08, methionine sulfoxide reductase B5 ,ATMSRB5;MSRB5
95,AT2G05160,-1.154119245,0.187046867,3.583602058,43.52634388,3.53E-10,6.45E-08, CCCH-type zinc fingerfamily protein with RNA-binding domain ,NA
96,AT4G17245,-0.750815283,-0.161163962,3.974402275,42.93359538,4.75E-10,8.58E-08, RING/U-box superfamily protein ,NA
97,AT5G26600,-0.645643736,-0.067112222,5.057528758,42.90937433,4.81E-10,8.60E-08, Pyridoxal phosphate (PLP)-dependent transferases superfamily protein ,NA
98,AT1G55960,0.672322094,0.098987886,5.269347859,42.40092009,6.21E-10,1.10E-07, Polyketide cyclase/dehydrase and lipid transport superfamily protein ,NA
99,AT3G02380,1.152538199,-0.211752934,3.310648492,41.7874596,8.43E-10,1.48E-07, CONSTANS-like 2 ,ATCOL2;BBX3;COL2
100,AT5G61420,0.641149843,0.208787653,4.953231483,41.44762135,9.99E-10,1.73E-07, myb domain protein 28 ,AtMYB28;HAG1;MYB28;PMG1
101,AT1G25275,-1.030965178,0.24068326,3.791242485,40.89259116,1.32E-09,2.26E-07, unknown protein; FUNCTIONS IN: molecular_function unknown; INVOLVED IN: response to karrikin; LOCATED IN: endomembrane system; EXPRESSED IN: 23 plant structures; EXPRESSED DURING: 13 growth stages; Has 35333 Blast hits to 34131 proteins in 2444 species: Archae - 798; Bacteria - 22429; Metazoa - 974; Fungi - 991; Plants - 531; Viruses - 0; Other Eukaryotes - 9610 (source: NCBI BLink). ,NA
102,AT4G29700,-1.207493779,-0.241366991,2.902616611,40.08024346,1.98E-09,3.36E-07, Alkaline-phosphatase-like family protein ,NA
103,AT4G35160,1.483342193,-0.2966959,2.508732961,39.96822756,2.09E-09,3.52E-07, O-methyltransferase family protein ,ASMT
104,AT4G21670,-0.980576118,0.225906686,4.257902104,38.87969409,3.61E-09,6.01E-07, C-terminal domain phosphatase-like 1 ,ATCPL1;CPL1;FRY2;RCF2;SHI4
105,AT2G35810,1.244096799,-0.564968384,2.976380827,38.86244872,3.64E-09,6.01E-07, unknown protein; BEST Arabidopsis thaliana protein match is: unknown protein (TAIR:AT2G35830.2); Has 153 Blast hits to 153 proteins in 52 species: Archae - 0; Bacteria - 62; Metazoa - 0; Fungi - 0; Plants - 82; Viruses - 0; Other Eukaryotes - 9 (source: NCBI BLink). ,NA
106,AT2G34300,-1.018651755,0.260573167,6.260079385,38.77042326,3.81E-09,6.23E-07, S-adenosyl-L-methionine-dependent methyltransferases superfamily protein ,NA
107,AT4G27560,-0.557142828,-0.021916249,6.739149808,38.43086666,4.52E-09,7.31E-07, UDP-Glycosyltransferase superfamily protein ,UGT79B2
108,AT5G15970,-1.469258766,0.51709829,6.407003034,37.83991495,6.07E-09,9.74E-07, stress-responsive protein (KIN2) / stress-induced protein (KIN2) / cold-responsive protein (COR6.6) / cold-regulated protein (COR6.6) ,AtCor6.6;COR6.6;KIN2
109,AT3G16420,0.598879263,0.176750808,5.918656265,37.60880055,6.81E-09,1.08E-06, PYK10-binding protein 1 ,JAL30;PBP1;PBPI
110,AT3G47800,-0.466007442,-0.231363235,4.395762817,37.42420632,7.47E-09,1.18E-06, Galactose mutarotase-like superfamily protein ,NA
111,AT2G39330,-3.020282865,-0.575759206,1.090338115,37.11918413,8.70E-09,1.36E-06, jacalin-related lectin 23 ,JAL23
112,AT3G16470,-0.693547187,-0.071949509,4.404461134,37.10322702,8.77E-09,1.36E-06, Mannose-binding lectin superfamily protein ,AtJAC1;JAL35;JR1
113,AT4G25740,-0.656465012,-0.166918123,6.085637387,36.29376034,1.31E-08,2.02E-06, RNA binding Plectin/S10 domain-containing protein ,NA
114,AT1G16060,-1.212738489,0.163691959,2.865780362,36.18752287,1.39E-08,2.11E-06, ARIA-interacting double AP2 domain protein ,ADAP;WRI3
115,AT4G37410,-1.541269765,-0.613602811,2.496138581,35.14576851,2.33E-08,3.52E-06," cytochrome P450, family 81, subfamily F, polypeptide 4 ",CYP81F4
116,AT1G01210,-0.500386557,-0.165417681,4.524468617,34.87041906,2.68E-08,4.00E-06," DNA-directed RNA polymerase, subunit M, archaeal ",NA
117,AT5G44620,2.247174196,0.241709414,1.313640295,34.36880574,3.44E-08,5.10E-06," cytochrome P450, family 706, subfamily A, polypeptide 3 ",CYP706A3
118,AT4G10060,-0.434814846,-0.026452068,7.363420882,33.93477907,4.28E-08,6.28E-06," Beta-glucosidase, GBA2 type family protein ",NA
119,AT5G60890,0.650083153,0.02161328,4.390403558,33.88231524,4.39E-08,6.39E-06, myb domain protein 34 ,AtATR1;ATMYB34;ATR1;MYB34
120,AT4G13495,-0.670789338,0.259501277,7.556187938,33.82380165,4.52E-08,6.53E-06, other RNA ,NA
121,AT3G16460,0.918084657,0.053258487,3.969901477,33.75324747,4.68E-08,6.71E-06, Mannose-binding lectin superfamily protein ,JAL34
122,AT5G44580,-1.761980236,-0.666685884,1.365678409,33.71109731,4.78E-08,6.79E-06, unknown protein; FUNCTIONS IN: molecular_function unknown; INVOLVED IN: biological_process unknown; LOCATED IN: endomembrane system; EXPRESSED IN: 18 plant structures; EXPRESSED DURING: 12 growth stages; BEST Arabidopsis thaliana protein match is: unknown protein (TAIR:AT5G44582.1); Has 30201 Blast hits to 17322 proteins in 780 species: Archae - 12; Bacteria - 1396; Metazoa - 17338; Fungi - 3422; Plants - 5037; Viruses - 0; Other Eukaryotes - 2996 (source: NCBI BLink). ,NA
123,AT3G08590,0.477134826,-0.036514782,6.26957887,33.25371667,6.01E-08,8.47E-06," Phosphoglycerate mutase, 2,3-bisphosphoglycerate-independent ",iPGAM2
124,AT4G12310,-0.877062497,-0.012845054,3.764888281,33.10891535,6.46E-08,9.03E-06," cytochrome P450, family 706, subfamily A, polypeptide 5 ",CYP706A5
125,AT3G49300,-2.958683907,-2.08654715,0.565211495,32.64773925,8.14E-08,1.13E-05, proline-rich family protein ,NA
126,AT5G53880,-1.039143963,0.431905363,9.259430913,32.26482408,9.86E-08,1.36E-05," unknown protein; FUNCTIONS IN: molecular_function unknown; INVOLVED IN: biological_process unknown; LOCATED IN: mitochondrion, plasma membrane; EXPRESSED IN: 23 plant structures; EXPRESSED DURING: 13 growth stages; Has 30201 Blast hits to 17322 proteins in 780 species: Archae - 12; Bacteria - 1396; Metazoa - 17338; Fungi - 3422; Plants - 5037; Viruses - 0; Other Eukaryotes - 2996 (source: NCBI BLink). ",NA
127,AT1G21440,-0.693991307,-0.010644156,6.103118746,32.05891835,1.09E-07,1.49E-05, Phosphoenolpyruvate carboxylase family protein ,NA
128,AT5G45950,0.510653583,-0.08797389,5.801571742,31.12637902,1.74E-07,2.35E-05, GDSL-like Lipase/Acylhydrolase superfamily protein ,NA
129,AT3G20100,1.792889581,-0.401582319,2.1403189,31.12091529,1.75E-07,2.35E-05," cytochrome P450, family 705, subfamily A, polypeptide 19 ",CYP705A19
130,AT1G68050,-0.831750355,0.199458627,5.046653176,30.79011019,2.06E-07,2.75E-05," flavin-binding, kelch repeat, f box 1 ",ADO3;FKF1
131,AT5G16370,-0.903887493,0.296147516,4.114065867,30.68592423,2.17E-07,2.87E-05, acyl activating enzyme 5 ,AAE5
132,AT4G30140,-1.02834479,-0.114844077,3.852016343,30.66676344,2.19E-07,2.88E-05, GDSL-like Lipase/Acylhydrolase superfamily protein ,CDEF1
133,AT4G22517,-0.975160154,-0.089741365,4.213101024,30.00116207,3.06E-07,3.98E-05, Bifunctional inhibitor/lipid-transfer protein/seed storage 2S albumin superfamily protein ,NA
134,AT1G77000,-1.182208226,0.401264467,2.917247102,29.87445099,3.26E-07,4.21E-05, RNI-like superfamily protein ,ATSKP2;2;SKP2B
135,AT3G63240,0.492938925,0.25829384,4.156765263,29.84791254,3.30E-07,4.23E-05, DNAse I-like superfamily protein ,NA
136,AT4G30960,0.316142699,0.290414163,7.776220234,29.83619885,3.32E-07,4.23E-05, SOS3-interacting protein 3 ,ATCIPK6;CIPK6;SIP3;SNRK3.14
137,AT1G47580,-0.688031072,-0.094562248,3.911713439,29.76895624,3.43E-07,4.34E-05, Pentatricopeptide repeat (PPR) superfamily protein ,DYW1
138,AT1G60260,-0.933166961,0.127989569,3.632921968,29.68321114,3.58E-07,4.50E-05, beta glucosidase 5 ,BGLU5
139,AT5G19120,-0.698190344,-0.572780832,2.998935216,29.4310819,4.07E-07,5.07E-05, Eukaryotic aspartyl protease family protein ,NA
140,AT1G27565,8.476689128,0.280154905,1.897693205,29.35017406,4.23E-07,5.24E-05, unknown protein; FUNCTIONS IN: molecular_function unknown; INVOLVED IN: biological_process unknown; LOCATED IN: cellular_component unknown; BEST Arabidopsis thaliana protein match is: unknown protein (TAIR:AT1G52905.1); Has 3 Blast hits to 3 proteins in 1 species: Archae - 0; Bacteria - 0; Metazoa - 0; Fungi - 0; Plants - 3; Viruses - 0; Other Eukaryotes - 0 (source: NCBI BLink). ,NA
141,AT4G13575,-0.738002195,0.505603769,4.897876146,29.028146,4.97E-07,6.11E-05, unknown protein; FUNCTIONS IN: molecular_function unknown; INVOLVED IN: biological_process unknown; LOCATED IN: cellular_component unknown; Has 30201 Blast hits to 17322 proteins in 780 species: Archae - 12; Bacteria - 1396; Metazoa - 17338; Fungi - 3422; Plants - 5037; Viruses - 0; Other Eukaryotes - 2996 (source: NCBI BLink). ,NA
142,AT2G34060,-0.966222925,0.288155417,3.109038634,28.94742322,5.18E-07,6.32E-05, Peroxidase superfamily protein ,NA
143,AT1G17665,-1.220665324,0.496496226,3.640397288,28.89055884,5.33E-07,6.46E-05, unknown protein; FUNCTIONS IN: molecular_function unknown; INVOLVED IN: biological_process unknown; LOCATED IN: endomembrane system; EXPRESSED IN: 15 plant structures; EXPRESSED DURING: 11 growth stages; Has 149 Blast hits to 146 proteins in 39 species: Archae - 0; Bacteria - 4; Metazoa - 21; Fungi - 5; Plants - 30; Viruses - 0; Other Eukaryotes - 89 (source: NCBI BLink). ,NA
144,AT3G12320,0.538139112,0.217757547,4.930903277,28.82443242,5.51E-07,6.60E-05, unknown protein; BEST Arabidopsis thaliana protein match is: unknown protein (TAIR:AT5G06980.4); Has 102 Blast hits to 102 proteins in 16 species: Archae - 0; Bacteria - 0; Metazoa - 0; Fungi - 0; Plants - 98; Viruses - 0; Other Eukaryotes - 4 (source: NCBI BLink). ,LNK3
145,AT5G24780,-1.369174331,-1.839913715,1.735139158,28.81914474,5.52E-07,6.60E-05, vegetative storage protein 1 ,ATVSP1;VSP1
146,AT1G72810,0.454982767,-0.040384959,5.657644968,28.61014806,6.13E-07,7.27E-05, Pyridoxal-5'-phosphate-dependent enzyme family protein ,NA
147,AT3G14900,-0.546690315,0.165476665,8.930134882,28.56367795,6.27E-07,7.39E-05, unknown protein; FUNCTIONS IN: molecular_function unknown; INVOLVED IN: embryo development; LOCATED IN: chloroplast; EXPRESSED IN: 19 plant structures; EXPRESSED DURING: 13 growth stages; Has 17135 Blast hits to 10204 proteins in 644 species: Archae - 47; Bacteria - 1684; Metazoa - 5536; Fungi - 2506; Plants - 1043; Viruses - 361; Other Eukaryotes - 5958 (source: NCBI BLink). ,EMB3120
148,AT5G65080,2.644106826,-0.068781553,1.39888262,28.47209119,6.57E-07,7.69E-05, K-box region and MADS-box transcription factor family protein  ,AGL68;MAF5
149,AT4G33666,-1.260091109,0.145082119,2.365539148,28.31325357,7.11E-07,8.27E-05, unknown protein; FUNCTIONS IN: molecular_function unknown; INVOLVED IN: biological_process unknown; LOCATED IN: chloroplast; EXPRESSED IN: 19 plant structures; EXPRESSED DURING: 11 growth stages; Has 30201 Blast hits to 17322 proteins in 780 species: Archae - 12; Bacteria - 1396; Metazoa - 17338; Fungi - 3422; Plants - 5037; Viruses - 0; Other Eukaryotes - 2996 (source: NCBI BLink). ,NA
150,AT2G33830,-1.244634444,-0.191063393,3.394354842,28.10702073,7.88E-07,9.11E-05, Dormancy/auxin associated family protein ,AtDRM2;DRM2
151,AT4G37560,0.985385021,-0.165109763,3.617396724,27.97233634,8.43E-07,9.68E-05, Acetamidase/Formamidase family protein ,NA
152,AT3G49680,-0.422501494,0.010322847,6.693495908,27.84971054,8.96E-07,0.000102192, branched-chain aminotransferase 3 ,ATBCAT-3;BCAT3
153,AT1G69120,5.403057603,-0.745277265,-0.249085727,27.46480985,1.09E-06,0.000123069, K-box region and MADS-box transcription factor family protein  ,AGL7;AP1;AtAP1
154,AT4G22490,-0.906345983,0.331401858,5.278577446,27.21743267,1.23E-06,0.000138369, Bifunctional inhibitor/lipid-transfer protein/seed storage 2S albumin superfamily protein ,NA
155,AT1G62800,-1.534777122,0.030183116,1.534398121,26.67581467,1.61E-06,0.000180234, aspartate aminotransferase 4 ,ASP4
156,AT2G32440,-0.405235416,-0.058541731,4.716030304,26.59177129,1.68E-06,0.000186764, ent-kaurenoic acid hydroxylase 2 ,ATKAO2;CYP88A4;KAO2
157,AT2G28605,-0.448826641,-0.072581827,4.67812691,26.53668193,1.73E-06,0.000190757, Photosystem II reaction center PsbP family protein ,NA
158,AT1G18990,-1.540717698,0.43240006,1.823148819,26.28811309,1.96E-06,0.000214635," Protein of unknown function, DUF593 ",NA
159,AT4G20690,-1.052046196,-1.818101611,1.353749283,26.16035447,2.09E-06,0.000227354, unknown protein; Has 86 Blast hits to 20 proteins in 1 species: Archae - 0; Bacteria - 0; Metazoa - 0; Fungi - 0; Plants - 86; Viruses - 0; Other Eukaryotes - 0 (source: NCBI BLink). ,NA
160,AT2G37690,-0.565268186,-0.016108645,5.454421533,26.07587218,2.18E-06,0.000235681," phosphoribosylaminoimidazole carboxylase, putative / AIR carboxylase, putative ",NA
161,AT5G49500,0.664930078,0.062995867,3.390907889,25.88793865,2.39E-06,0.000256246," Signal recognition particle, SRP54 subunit protein ",NA
162,AT4G18440,-0.563562684,-0.144743872,6.036222102,25.88370723,2.40E-06,0.000256246, L-Aspartase-like family protein ,NA
163,AT4G21990,-0.745648647,-0.357986226,4.923770499,25.78438251,2.52E-06,0.000267641, APS reductase 3 ,APR3;ATAPR3;PRH-26;PRH26
164,AT2G34655,1.284836205,0.835170091,1.097447553,25.7607059,2.55E-06,0.000269177," unknown protein; FUNCTIONS IN: molecular_function unknown; INVOLVED IN: biological_process unknown; LOCATED IN: endomembrane system; EXPRESSED IN: stem, root, inflorescence, cultured cell, leaf; Has 35333 Blast hits to 34131 proteins in 2444 species: Archae - 798; Bacteria - 22429; Metazoa - 974; Fungi - 991; Plants - 531; Viruses - 0; Other Eukaryotes - 9610 (source: NCBI BLink). ",NA
165,AT1G54010,1.005737041,-1.232438188,3.474571402,25.69152902,2.64E-06,0.000276962, GDSL-like Lipase/Acylhydrolase superfamily protein ,GLL23
166,AT1G52905,-0.994090502,-0.073447851,2.902874044,25.65227063,2.69E-06,0.000280751, unknown protein; BEST Arabidopsis thaliana protein match is: unknown protein (TAIR:AT1G27565.1); Has 35333 Blast hits to 34131 proteins in 2444 species: Archae - 798; Bacteria - 22429; Metazoa - 974; Fungi - 991; Plants - 531; Viruses - 0; Other Eukaryotes - 9610 (source: NCBI BLink). ,NA
167,AT5G04590,-0.272202536,-0.230414441,7.491666642,25.6233279,2.73E-06,0.000283137, sulfite reductase ,SIR
168,AT2G15020,1.146435376,0.001532408,3.630898378,25.43424732,3.00E-06,0.000309359, unknown protein; BEST Arabidopsis thaliana protein match is: unknown protein (TAIR:AT5G64190.1); Has 72 Blast hits to 72 proteins in 10 species: Archae - 0; Bacteria - 0; Metazoa - 0; Fungi - 0; Plants - 72; Viruses - 0; Other Eukaryotes - 0 (source: NCBI BLink). ,NA
169,AT3G04770,-0.777841442,0.220289372,4.355079732,25.39442934,3.06E-06,0.000313712, 40s ribosomal protein SA B ,RPSAb
170,AT2G43150,1.064319851,-0.018295901,6.051399026,25.00973163,3.71E-06,0.000378012, Proline-rich extensin-like family protein ,NA
171,AT5G49730,0.937683605,-0.241553514,5.878824892,24.92896215,3.86E-06,0.000389335, ferric reduction oxidase 6 ,ATFRO6;FRO6
172,AT3G15357,-1.626918147,0.444140473,2.621489629,24.92730941,3.86E-06,0.000389335," unknown protein; INVOLVED IN: biological_process unknown; LOCATED IN: chloroplast; EXPRESSED IN: shoot apex, hypocotyl, root, leaf; Has 6931 Blast hits to 2036 proteins in 230 species: Archae - 7; Bacteria - 933; Metazoa - 1824; Fungi - 836; Plants - 482; Viruses - 218; Other Eukaryotes - 2631 (source: NCBI BLink). ",NA
173,AT1G60270,-1.011594995,0.256796382,3.727872614,24.86280496,3.99E-06,0.000399772, beta glucosidase 6 ,BGLU6
174,AT4G16870,0.831012068,-0.015680297,7.016871644,24.82898003,4.06E-06,0.000404254, transposable element gene ,NA
175,AT4G34138,-0.486730161,-0.176416972,5.743516822,24.67759966,4.38E-06,0.000433549, UDP-glucosyl transferase 73B1 ,UGT73B1
176,AT1G52190,0.759045006,-0.147583967,4.941783585,24.40253832,5.02E-06,0.000493921, Major facilitator superfamily protein ,AtNPF1.2;NPF1.2;NRT1.11
177,AT3G48490,-0.896590273,0.375185988,3.385839263,24.39413009,5.05E-06,0.000493921, unknown protein; Has 16 Blast hits to 16 proteins in 7 species: Archae - 0; Bacteria - 0; Metazoa - 0; Fungi - 1; Plants - 15; Viruses - 0; Other Eukaryotes - 0 (source: NCBI BLink). ,NA
178,AT3G12965,-0.729378821,0.230330205,4.88711236,24.34532929,5.17E-06,0.000503277, other RNA ,sORF23
179,AT1G07050,-1.342684217,0.733087448,5.590185997,24.07858538,5.91E-06,0.00057187, CCT motif family protein ,FITNESS
180,AT5G55930,-0.827458528,-0.062226186,2.500532755,23.86570433,6.57E-06,0.000632563, oligopeptide transporter 1 ,ATOPT1;OPT1
181,AT5G61380,-0.436604444,0.178527593,6.870748006,23.78087869,6.86E-06,0.000656323, CCT motif -containing response regulator protein ,APRR1;AtTOC1;PRR1;TOC1
182,AT1G67195,-0.744169497,0.204417321,4.603935467,23.64700134,7.33E-06,0.000697904, MIR414 (MICRORNA 414) ,MIR414;sORF16
183,AT3G11120,-0.841063075,0.376411526,9.480460417,23.59860965,7.51E-06,0.00071109, Ribosomal protein L41 family ,NA
184,AT5G61290,0.601455059,0.535384154,2.860490078,23.48424484,7.95E-06,0.000748844, Flavin-binding monooxygenase family protein ,NA
185,AT2G22170,-0.747760259,0.10586945,4.653000253,23.43876338,8.13E-06,0.000761928," Lipase/lipooxygenase, PLAT/LH2 family protein ",PLAT2
186,AT1G11580,-1.024279337,-0.249212386,2.1566636,23.41658631,8.23E-06,0.00076583, methylesterase PCR A ,ATPMEPCRA;PMEPCRA
187,AT3G21560,-0.487842774,0.30684628,6.391133858,23.40704118,8.26E-06,0.00076583, UDP-Glycosyltransferase superfamily protein ,BRT1;UGT84A2
188,AT5G11740,-0.435241126,0.147797195,7.793599519,23.30095607,8.71E-06,0.000803253, arabinogalactan protein 15 ,AGP15;ATAGP15
189,AT4G19870,0.904622149,-0.347263685,2.909622823,23.27366147,8.83E-06,0.000809982, Galactose oxidase/kelch repeat superfamily protein ,NA
190,AT2G39310,0.848281502,0.105726438,3.178588317,23.25330726,8.93E-06,0.000812629, jacalin-related lectin 22 ,JAL22
191,AT1G23410,-0.661680292,0.021978729,4.891821169,23.23900256,8.99E-06,0.000812629, Ribosomal protein S27a / Ubiquitin family protein ,NA
192,AT5G60910,1.20763824,-0.129393177,1.684609729,23.23563924,9.00E-06,0.000812629, AGAMOUS-like 8 ,AGL8;FUL
193,AT5G53870,0.588294792,0.593008397,2.336472954,22.97209055,1.03E-05,0.000922285, early nodulin-like protein 1 ,AtENODL1;ENODL1
194,AT1G26250,1.171039242,0.193909557,3.594533073,22.75170889,1.15E-05,0.001024415, Proline-rich extensin-like family protein ,EXT18
195,AT4G17470,-4.27831661,2.480595768,0.949979689,22.7380455,1.15E-05,0.001026148, alpha/beta-Hydrolases superfamily protein ,NA
196,AT1G13710,0.848862854,-0.570644693,4.805205921,22.72202795,1.16E-05,0.001029122," cytochrome P450, family 78, subfamily A, polypeptide 5 ",CYP78A5;KLU
197,AT4G20860,-2.30450403,-0.15127133,0.547142244,22.67434733,1.19E-05,0.001048601, FAD-binding Berberine family protein ,AtBBE22;BBE22
198,ATMG01190,6.807940328,-6.176746216,0.829812334,22.55184386,1.27E-05,0.001109207, ATP synthase subunit 1 ,ATP1
199,AT2G32180,-0.562672002,0.329723102,5.508825444,22.50680209,1.30E-05,0.00112877, plastid transcriptionally active 18 ,PTAC18
200,AT2G36080,-0.761518453,-0.407218872,2.699729643,22.49536439,1.30E-05,0.001129567, AP2/B3-like transcriptional factor family protein ,ABS2;NGAL1
201,AT1G09190,-0.783637469,0.450511765,4.203987156,22.4744719,1.32E-05,0.00113575, Tetratricopeptide repeat (TPR)-like superfamily protein ,NA
202,AT2G35020,-0.500847386,0.097264819,5.527179599,22.38768467,1.38E-05,0.001180248, N-acetylglucosamine-1-phosphate uridylyltransferase 2 ,GLCNA.UT2;GlcNAc1pUT2
203,AT2G42170,-0.469054792,-0.39206121,3.587623014,22.36063959,1.39E-05,0.001188213, Actin family protein ,NA
204,AT1G31230,-0.476148608,0.079084354,5.828295549,22.35452795,1.40E-05,0.001188213, aspartate kinase-homoserine dehydrogenase i ,AK-HSDH;AK-HSDH I
205,AT3G19360,-0.492971466,-0.013125562,4.518095213,22.27531702,1.46E-05,0.001230186, Zinc finger (CCCH-type) family protein ,NA
206,AT2G20724,-1.125965174,0.512621103,2.649193792,22.2601858,1.47E-05,0.001233381, pseudogene of unknown protein ,NA
207,AT1G26560,0.452080161,0.219384549,4.54506235,22.25071264,1.47E-05,0.001233381, beta glucosidase 40 ,BGLU40
208,AT2G19910,0.908017426,-0.095085238,2.747515344,22.2271701,1.49E-05,0.001241985, RNA-dependent RNA polymerase family protein ,NA
209,AT3G20390,-0.389368607,0.026773211,8.105018622,22.19869133,1.51E-05,0.001253769, endoribonuclease L-PSP family protein ,RidA
210,AT5G63980,-0.38295187,-0.231853285,5.422425154,22.10434928,1.59E-05,0.001308069, Inositol monophosphatase family protein ,ALX8;AtFRY1;ATSAL1;FRY1;HOS2;RON1;SAL1;SUPO1
211,AT5G24420,0.938125504,-0.328613566,3.359280766,22.04510428,1.63E-05,0.001341011, 6-phosphogluconolactonase 5 ,PGL5
212,AT2G35930,-0.75894195,-0.13973685,2.624630753,21.8658208,1.79E-05,0.001459856, plant U-box 23 ,AtPUB23;PUB23
213,AT1G50732,-0.569609043,-0.284433166,4.130942924,21.76916507,1.87E-05,0.001524947, unknown protein. ,NA
214,AT3G58200,0.962082139,-0.082213152,2.028607222,21.73271196,1.91E-05,0.001545739, TRAF-like family protein ,NA
215,AT1G28570,1.312281181,0.44347126,0.951508009,21.70740028,1.93E-05,0.001558145, SGNH hydrolase-type esterase superfamily protein ,NA
216,AT4G26288,-1.972502576,0.386325659,1.075713511,21.68534731,1.95E-05,0.001568127, FUNCTIONS IN: molecular_function unknown; INVOLVED IN: biological_process unknown; LOCATED IN: cellular_component unknown; BEST Arabidopsis thaliana protein match is: oxidative stress 3 (TAIR:AT5G56550.1); Has 289 Blast hits to 232 proteins in 41 species: Archae - 0; Bacteria - 12; Metazoa - 36; Fungi - 21; Plants - 151; Viruses - 2; Other Eukaryotes - 67 (source: NCBI BLink). ,NA
217,AT3G22660,-0.532671191,0.124220305,7.959152737,21.61558703,2.02E-05,0.001616306, rRNA processing protein-related ,EBP2
218,AT5G43580,-2.848975529,0.429248505,0.756275269,21.54915285,2.09E-05,0.001656784," Serine protease inhibitor, potato inhibitor I-type family protein ",UPI
219,AT1G19670,-0.237815698,-0.498960256,4.851353132,21.54776775,2.09E-05,0.001656784, chlorophyllase 1 ,ATCLH1;ATHCOR1;CLH1;CORI1
220,AT5G44630,3.401950192,-0.663446342,0.140152998,21.49309502,2.15E-05,0.00169496, Terpenoid cyclases/Protein prenyltransferases superfamily protein ,NA
221,AT1G14790,1.004515615,-0.550956408,2.952438925,21.45837164,2.19E-05,0.001716841, RNA-dependent RNA polymerase 1 ,AtRDR1;ATRDRP1;RDR1
222,AT4G21940,0.846888019,-0.456981037,2.756674611,21.44923745,2.20E-05,0.001716931, calcium-dependent protein kinase 15 ,CPK15
223,AT3G18510,-1.263678736,1.181564851,2.386757983,21.40493489,2.25E-05,0.001745659, unknown protein; Has 15 Blast hits to 15 proteins in 9 species: Archae - 0; Bacteria - 0; Metazoa - 0; Fungi - 0; Plants - 15; Viruses - 0; Other Eukaryotes - 0 (source: NCBI BLink). ,NA
224,AT1G22400,-0.621489595,0.12616812,6.807463511,21.39811203,2.26E-05,0.001745659, UDP-Glycosyltransferase superfamily protein ,ATUGT85A1;UGT85A1
225,AT1G47530,-0.378102551,-0.02223043,6.690846139,21.33062437,2.33E-05,0.001797545, MATE efflux family protein ,DTX33
226,AT5G40760,0.629042001,-0.19911533,4.383528314,21.30464177,2.36E-05,0.001812992, glucose-6-phosphate dehydrogenase 6 ,G6PD6
227,AT5G28919,-0.371021765,-0.121942049,5.576879202,21.11239437,2.60E-05,0.001987121, FUNCTIONS IN: molecular_function unknown; INVOLVED IN: biological_process unknown; LOCATED IN: cellular_component unknown; BEST Arabidopsis thaliana protein match is: Expressed protein (TAIR:AT3G01345.1); Has 30201 Blast hits to 17322 proteins in 780 species: Archae - 12; Bacteria - 1396; Metazoa - 17338; Fungi - 3422; Plants - 5037; Viruses - 0; Other Eukaryotes - 2996 (source: NCBI BLink). ,NA
228,AT5G67150,-0.199585846,-0.718820551,3.508296099,20.98947728,2.77E-05,0.00210381, HXXXD-type acyl-transferase family protein ,NA
229,AT1G07180,0.542643222,-0.114732732,5.246003674,20.89106424,2.91E-05,0.00220027, alternative  NAD(P)H dehydrogenase 1 ,ATNDI1;NDA1
230,AT3G42658,2.251779322,-0.097095058,4.291069886,20.57874136,3.40E-05,0.002560965, transposable element gene ,SADHU3-2
231,AT2G47440,0.42328708,-0.058375903,5.218460598,20.54389275,3.46E-05,0.002594698, Tetratricopeptide repeat (TPR)-like superfamily protein ,NA
232,AT1G04350,0.64347509,0.091913158,3.696351948,20.52026247,3.50E-05,0.002605546, 2-oxoglutarate (2OG) and Fe(II)-dependent oxygenase superfamily protein ,NA
233,AT4G21760,0.974306807,0.492450845,2.325579776,20.51830674,3.50E-05,0.002605546, beta-glucosidase 47 ,BGLU47
234,AT3G43740,-0.980910639,0.493992352,2.37947214,20.48846158,3.56E-05,0.002624631, Leucine-rich repeat (LRR) family protein ,NA
235,AT1G09430,0.394548936,0.106968621,5.072472997,20.4866165,3.56E-05,0.002624631, ATP-citrate lyase A-3 ,ACLA-3
236,AT3G62410,-0.551605487,-0.068906221,6.037014609,20.4615519,3.60E-05,0.00264647, CP12 domain-containing protein 2 ,CP12;CP12-2
237,AT2G14900,-0.781886338,0.374293148,4.45444335,20.43922901,3.64E-05,0.002664882, Gibberellin-regulated family protein ,NA
238,AT1G78260,-0.671934789,0.406164904,5.345574476,20.41209825,3.69E-05,0.002679229, RNA-binding (RRM/RBD/RNP motifs) family protein ,NA
239,AT3G16250,-0.246949143,-0.255662134,5.115024257,20.41168338,3.70E-05,0.002679229, NDH-dependent cyclic electron flow 1 ,NDF4;PnsB3
240,AT1G23740,0.415109671,-0.182315808,7.040261469,20.34889432,3.81E-05,0.002753157," Oxidoreductase, zinc-binding dehydrogenase family protein ",AOR
241,AT1G75100,0.540605196,-0.090666702,4.835561782,20.30157992,3.90E-05,0.002807368, J-domain protein required for chloroplast accumulation response 1 ,AUXILIN-LIKE6;JAC1
242,AT1G72640,0.31988227,0.1320812,6.067293206,20.25895263,3.99E-05,0.002855995, NAD(P)-binding Rossmann-fold superfamily protein ,NA
243,AT3G23920,0.441434572,-0.140746738,5.306567323,20.24751708,4.01E-05,0.002860551, beta-amylase 1 ,AtBAM1;BAM1;BMY7;TR-BAMY
244,AT5G50260,1.270674779,0.307081293,2.046324813,20.23734318,4.03E-05,0.002863356, Cysteine proteinases superfamily protein ,CEP1
245,AT2G04400,-0.334641369,-0.230338935,4.722935965,20.17486282,4.16E-05,0.002942162, Aldolase-type TIM barrel family protein ,IGPS
246,AT4G27300,0.432479195,0.686391707,2.804692199,20.16595105,4.18E-05,0.002943288, S-locus lectin protein kinase family protein ,NA
247,AT5G49330,-0.644474685,0.131556535,4.963522398,20.1383547,4.24E-05,0.002972099, myb domain protein 111 ,ATMYB111;MYB111;PFG3
248,AT1G73590,0.396746595,-0.023071482,5.270476092,20.12716861,4.26E-05,0.002976718, Auxin efflux carrier family protein ,ATPIN1;PIN1
249,AT2G43550,-0.610399326,-0.378247443,3.922492155,20.11293317,4.29E-05,0.00298594, Scorpion toxin-like knottin superfamily protein ,NA
250,AT1G15000,-0.482546851,0.217406262,5.861677463,19.98791832,4.57E-05,0.003165827, serine carboxypeptidase-like 50 ,scpl50
251,AT2G16890,0.524812421,0.344639066,3.273161754,19.91601208,4.73E-05,0.003268644, UDP-Glycosyltransferase superfamily protein ,NA
252,AT5G17270,-0.38708025,0.043853781,5.45289359,19.89303949,4.79E-05,0.003293285, Protein prenylyltransferase superfamily protein ,NA
253,AT5G15022,-1.339660227,0.541920972,4.97947718,19.77614981,5.08E-05,0.003477695," Potential natural antisense gene, locus overlaps with AT5G15030 ",NA
254,AT4G33150,0.693578512,-0.152078622,3.743497328,19.68075048,5.33E-05,0.003631916, lysine-ketoglutarate reductase/saccharopine dehydrogenase bifunctional enzyme ,LKR;LKR/SDH;SDH
255,AT5G40942,-0.97369069,-0.28924187,1.650784084,19.67362075,5.34E-05,0.003631916, pseudogene of ribonucleoside-diphosphate reductase small chain/ ribonucleotide reductase ,RNR2B
256,AT1G25560,-0.702099031,-0.34485706,2.632934879,19.64920782,5.41E-05,0.003662159, AP2/B3 transcription factor family protein ,AtTEM1;EDF1;TEM1
257,AT5G02940,-0.231995036,-0.177293604,6.172088492,19.46588907,5.93E-05,0.003998078, Protein of unknown function (DUF1012) ,NA
258,AT2G32560,0.436237969,-0.167272405,5.050652518,19.42221401,6.06E-05,0.004070507, F-box family protein ,NA
259,AT5G19740,0.527846541,-0.142049459,4.707710894,19.38831807,6.16E-05,0.004124097, Peptidase M28 family protein ,LAMP1
260,AT1G12770,-0.298700106,-0.123442169,7.394524395,19.28500607,6.49E-05,0.004326027, P-loop containing nucleoside triphosphate hydrolases superfamily protein ,EMB1586;ISE1
261,AT3G23030,-0.268310527,-0.384452937,4.436412512,19.07647634,7.20E-05,0.004769608, indole-3-acetic acid inducible 2 ,IAA2
262,AT5G01881,-0.925572711,0.052287972,2.679427309,19.07445143,7.21E-05,0.004769608, unknown protein; Has 3 Blast hits to 3 proteins in 2 species: Archae - 0; Bacteria - 0; Metazoa - 0; Fungi - 0; Plants - 3; Viruses - 0; Other Eukaryotes - 0 (source: NCBI BLink). ,NA
263,AT1G03410,-0.49685536,-0.038092547,3.823067434,19.06025305,7.26E-05,0.004785324, 2-oxoglutarate (2OG) and Fe(II)-dependent oxygenase superfamily protein ,2A6
264,AT5G57685,0.362563421,0.263345305,4.943341382,19.032954,7.36E-05,0.004832714, glutamine dumper 3 ,ATGDU3;GDU3;LSB1
265,AT3G05880,-0.705310015,0.421435987,5.571245535,18.97382201,7.58E-05,0.004958947, Low temperature and salt responsive protein family ,RCI2A
266,AT2G27775,-0.709238398,0.190798167,3.68793808,18.94321653,7.70E-05,0.005016486, FUNCTIONS IN: molecular_function unknown; INVOLVED IN: biological_process unknown; LOCATED IN: chloroplast; EXPRESSED IN: 22 plant structures; EXPRESSED DURING: 13 growth stages; BEST Arabidopsis thaliana protein match is: Tetratricopeptide repeat (TPR)-like superfamily protein (TAIR:AT2G27800.1); Has 21 Blast hits to 21 proteins in 5 species: Archae - 0; Bacteria - 0; Metazoa - 0; Fungi - 0; Plants - 21; Viruses - 0; Other Eukaryotes - 0 (source: NCBI BLink). ,NA
267,AT2G07706,1.575057192,-0.469824782,1.139936699,18.88042265,7.95E-05,0.005157099, unknown protein; BEST Arabidopsis thaliana protein match is: unknown protein (TAIR:ATMG00470.1); Has 35333 Blast hits to 34131 proteins in 2444 species: Archae - 798; Bacteria - 22429; Metazoa - 974; Fungi - 991; Plants - 531; Viruses - 0; Other Eukaryotes - 9610 (source: NCBI BLink). ,NA
268,AT4G12917,-1.397676844,-0.406455962,1.323880453,18.77175764,8.39E-05,0.005424732, other RNA ,NA
269,AT2G30740,0.428369445,0.354671628,3.901506371,18.76375875,8.42E-05,0.005426224, Protein kinase superfamily protein ,NA
270,AT3G11170,-0.239373433,-0.090383826,7.214975022,18.72326383,8.60E-05,0.005516703, fatty acid desaturase 7 ,AtFAD7;FAD7;FADD
271,AT3G05730,-0.625581863,0.134318176,6.118330676,18.71524138,8.63E-05,0.005518437, Encodes a defensin-like (DEFL) family protein. ,NA
272,AT5G01015,-0.606104005,0.106888563,4.370208426,18.69442097,8.72E-05,0.005555685, unknown protein; FUNCTIONS IN: molecular_function unknown; INVOLVED IN: biological_process unknown; LOCATED IN: endomembrane system; EXPRESSED IN: 23 plant structures; EXPRESSED DURING: 13 growth stages; BEST Arabidopsis thaliana protein match is: unknown protein (TAIR:AT1G65295.1); Has 30201 Blast hits to 17322 proteins in 780 species: Archae - 12; Bacteria - 1396; Metazoa - 17338; Fungi - 3422; Plants - 5037; Viruses - 0; Other Eukaryotes - 2996 (source: NCBI BLink). ,NA
273,AT1G56650,-0.256444275,-1.248096599,2.266327764,18.67214551,8.82E-05,0.00559733, production of anthocyanin pigment 1 ,ATMYB75;AtPAP1;MYB75;PAP1;SIAA1
274,AT5G24570,-1.207922933,1.029128757,2.316167218,18.65196752,8.91E-05,0.005633452, unknown protein; Has 30201 Blast hits to 17322 proteins in 780 species: Archae - 12; Bacteria - 1396; Metazoa - 17338; Fungi - 3422; Plants - 5037; Viruses - 0; Other Eukaryotes - 2996 (source: NCBI BLink). ,NA
275,AT5G61370,-0.613925641,0.29307552,4.012115584,18.62853593,9.01E-05,0.005679114, Pentatricopeptide repeat (PPR) superfamily protein ,NA
276,AT3G49120,0.800284745,-0.242147976,4.400775983,18.59136016,9.18E-05,0.005764701, peroxidase CB ,ATPCB;ATPERX34;PERX34;PRX34;PRXCB
277,AT1G76790,-0.627408955,-0.710062042,2.645839237,18.5052211,9.59E-05,0.005982422, O-methyltransferase family protein ,IGMT5
278,AT1G64600,-0.503939096,0.320858925,5.953398093,18.50277536,9.60E-05,0.005982422, methyltransferases;copper ion binding ,NA
279,AT1G74810,-1.044033314,0.042852503,2.486378296,18.4175792,0.000100155,0.006220392, HCO3- transporter family ,BOR5
280,AT3G22231,0.901847913,3.884458216,0.68696255,18.3806086,0.000102024,0.006313817, pathogen and circadian controlled 1 ,PCC1
281,AT1G48598,2.105674634,-0.353518879,2.824949916,18.36158129,0.000102999,0.006351487, conserved peptide upstream open reading frame 31 ,NA
282,AT5G43700,-0.314904448,-0.164782855,5.800123532,18.34706214,0.00010375,0.006375077, AUX/IAA transcriptional regulator family protein ,ATAUX2-11;IAA4
283,AT4G16690,-0.508617526,-1.194519754,1.887504966,18.31547303,0.000105401,0.006453682, methyl esterase 16 ,ATMES16;MES16
284,AT4G32340,-0.524112722,-0.075826742,5.659756901,18.19382672,0.000112011,0.006834249, Tetratricopeptide repeat (TPR)-like superfamily protein ,NA
285,AT2G46280,-0.381160029,0.12090577,6.616579618,18.15501706,0.000114206,0.006916214, TGF-beta receptor interacting protein 1 ,TIF3I1;TRIP-1;TRIP1
286,AT5G47220,3.184792085,-2.285158177,0.362512997,18.14352884,0.000114864,0.006916214, ethylene responsive element binding factor 2 ,ATERF-2;ATERF2;ERF2
287,AT1G16400,-2.147888853,-1.451997012,0.378365368,18.14266499,0.000114913,0.006916214," cytochrome P450, family 79, subfamily F, polypeptide 2 ",CYP79F2
288,AT5G22100,-0.584376149,-0.004701675,4.055193324,18.14201047,0.000114951,0.006916214, RNA cyclase family protein ,NA
289,AT5G38980,-0.563970478,-0.036221508,3.968402056,17.99567886,0.000123677,0.007415468, unknown protein; FUNCTIONS IN: molecular_function unknown; INVOLVED IN: biological_process unknown; LOCATED IN: endomembrane system; EXPRESSED IN: 22 plant structures; EXPRESSED DURING: 13 growth stages; Has 3 Blast hits to 3 proteins in 1 species: Archae - 0; Bacteria - 0; Metazoa - 0; Fungi - 0; Plants - 3; Viruses - 0; Other Eukaryotes - 0 (source: NCBI BLink). ,NA
290,AT3G12770,-0.689094244,0.357037899,4.022443464,17.9385845,0.000127258,0.007603898, mitochondrial editing factor  22 ,MEF22
291,AT3G50350,-1.818972403,1.013323318,1.179318499,17.92661687,0.000128022,0.007623248, Protein of unknown function (DUF1685) ,NA
292,AT5G28490,0.651335254,-0.063184501,3.796224423,17.87593548,0.000131308,0.007792118, Protein of unknown function (DUF640) ,LSH1;OBO2
293,AT3G26100,0.419856203,-0.198938157,5.07594488,17.85257611,0.00013285,0.007856754, Regulator of chromosome condensation (RCC1) family protein ,NA
294,AT2G39705,-1.092827336,0.777789933,3.018373918,17.81064865,0.000135665,0.00799591, ROTUNDIFOLIA like 8 ,DVL11;RTFL8
295,AT1G65985,-2.398507109,1.025981948,0.855338515,17.73967453,0.000140565,0.008256672, Plant protein of unknown function (DUF247) ,NA
296,AT3G13790,-0.684672497,0.215791755,4.240222142,17.72461136,0.000141628,0.008290988, Glycosyl hydrolases family 32 protein ,ATBFRUCT1;AtCWI1;ATCWINV1;CWI1
297,AT1G20691,-0.71421409,0.145511794,3.822003306,17.71553031,0.000142273,0.008300676," Potential natural antisense gene, locus overlaps with AT1G20690 ",NA
298,AT4G16860,0.702176947,-0.271862569,6.167697316,17.68235757,0.000144652,0.008411182, Disease resistance protein (TIR-NBS-LRR class) family ,RPP4
299,AT1G30420,0.73462806,0.139599092,2.746566502,17.66897294,0.000145623,0.008439341, multidrug resistance-associated protein 12 ,ABCC11;ATMRP12;MRP12
300,AT1G66760,-0.86610223,-0.098580434,2.91290992,17.65584188,0.000146583,0.008445021, MATE efflux family protein ,NA
301,AT1G28250,0.247182014,-1.075272209,3.087577503,17.65429393,0.000146696,0.008445021, unknown protein; Has 22 Blast hits to 22 proteins in 10 species: Archae - 0; Bacteria - 0; Metazoa - 0; Fungi - 0; Plants - 22; Viruses - 0; Other Eukaryotes - 0 (source: NCBI BLink). ,NA
302,AT5G06980,0.689885879,-0.329988453,4.20967834,17.64125231,0.000147656,0.008472123, unknown protein; FUNCTIONS IN: molecular_function unknown; INVOLVED IN: response to karrikin; LOCATED IN: cellular_component unknown; EXPRESSED IN: 21 plant structures; EXPRESSED DURING: 11 growth stages; BEST Arabidopsis thaliana protein match is: unknown protein (TAIR:AT3G12320.1). ,LNK4
303,AT2G23010,-0.807764683,-0.100841136,2.777707598,17.62300323,0.000149009,0.008521563, serine carboxypeptidase-like 9 ,SCPL9
304,AT1G08230,0.061383849,0.811640789,2.944028635,17.59360555,0.000151216,0.008619299, Transmembrane amino acid transporter family protein ,NA
305,AT5G55380,0.742331359,0.38058941,2.065578398,17.56898663,0.000153089,0.008664682, MBOAT (membrane bound O-acyl transferase) family protein ,NA
306,AT5G49450,-0.680594372,0.119468785,3.299019313,17.56461804,0.000153423,0.008664682, basic leucine-zipper 1 ,AtbZIP1;bZIP1
307,AT5G49448,-0.680594586,0.119467614,3.299019313,17.5634625,0.000153512,0.008664682, conserved peptide upstream open reading frame 4 ,NA
308,AT5G52570,0.656275584,0.201744897,2.66682327,17.4865881,0.000159528,0.008971339, beta-carotene hydroxylase 2 ,B2;BCH2;BETA-OHASE 2;CHY2
309,AT2G24270,0.410859526,-0.165861882,7.307504045,17.48091597,0.000159981,0.008971339, aldehyde dehydrogenase 11A3 ,ALDH11A3
310,AT3G16230,0.151850549,0.292157049,5.339080371,17.42112032,0.000164836,0.009213795, Predicted eukaryotic LigT ,NA
311,AT5G64550,0.610299982,-0.170878465,3.608641252,17.37597429,0.000168599,0.009377222, loricrin-related ,NA
312,AT5G64552,0.610305879,-0.170885123,3.608641252,17.37309508,0.000168842,0.009377222, conserved peptide upstream open reading frame 22 ,NA
313,AT3G25770,-1.26430746,-0.002097286,3.392823079,17.35748322,0.000170165,0.009420512, allene oxide cyclase 2 ,AOC2
314,AT4G26850,0.449966736,-0.156929528,6.462506386,17.31756905,0.000173595,0.0095798, mannose-1-phosphate guanylyltransferase (GDP)s;GDP-galactose:mannose-1-phosphate guanylyltransferases;GDP-galactose:glucose-1-phosphate guanylyltransferases;GDP-galactose:myoinositol-1-phosphate guanylyltransferases;glucose-1-phosphate guanylyltransferase ,GGP;VTC2
315,AT1G48600,0.41625461,0.320814722,6.127881299,17.30331788,0.000174837,0.009617676, S-adenosyl-L-methionine-dependent methyltransferases superfamily protein ,AtPMEAMT;AtPMT2;PMEAMT
316,AT4G00380,0.648386953,-0.251889394,4.181475386,17.27807974,0.000177057,0.009708989, XH/XS domain-containing protein ,FDM2;IDP2;INDL2
317,AT2G19385,-0.511307361,0.193278319,4.784112433,17.24630843,0.000179892,0.009829356, zinc ion binding ,NA
318,AT1G78970,1.056873099,0.442852309,1.581510289,17.24081881,0.000180386,0.009829356, lupeol synthase 1 ,ATLUP1;LUP1
319,AT1G31550,-0.757988502,-0.320075346,2.332104734,17.21443122,0.000182782,0.00992868, GDSL-like Lipase/Acylhydrolase superfamily protein ,NA
320,AT1G37130,0.845660315,-0.502286206,7.044184222,17.14716983,0.000189034,0.010211045, nitrate reductase 2 ,ATNR2;B29;CHL3;NIA2;NIA2-1;NR;NR2
321,AT5G12050,-0.176261942,-0.680230978,4.574811884,17.1458462,0.000189159,0.010211045, unknown protein; BEST Arabidopsis thaliana protein match is: unknown protein (TAIR:AT3G13980.1); Has 1807 Blast hits to 1807 proteins in 277 species: Archae - 0; Bacteria - 0; Metazoa - 736; Fungi - 347; Plants - 385; Viruses - 0; Other Eukaryotes - 339 (source: NCBI BLink). ,BG1
322,AT4G12980,0.612132086,-0.116631577,4.806504011,17.11496031,0.000192103,0.010337753, Auxin-responsive family protein ,NA
323,AT3G55485,-2.76868127,1.845775673,2.316873889,17.1073921,0.000192831,0.01034482,  ,NA
324,AT4G27310,0.562880709,-0.156193572,5.915305586,17.09214658,0.000194307,0.010391804, B-box type zinc finger family protein ,BBX28
325,AT4G28590,-0.324091494,-0.108522953,4.686118955,17.08238869,0.000195257,0.010410498, FUNCTIONS IN: molecular_function unknown; INVOLVED IN: biological_process unknown; LOCATED IN: chloroplast; EXPRESSED IN: 21 plant structures; EXPRESSED DURING: 10 growth stages; BEST Arabidopsis thaliana protein match is: Thioredoxin superfamily protein (TAIR:AT2G31840.1); Has 114 Blast hits to 112 proteins in 39 species: Archae - 2; Bacteria - 0; Metazoa - 17; Fungi - 6; Plants - 67; Viruses - 0; Other Eukaryotes - 22 (source: NCBI BLink). ,AtECB1;ECB1;MRL7;SVR4
326,AT3G52630,-0.554195558,0.181676735,3.826014212,16.99693165,0.000203781,0.010831635," Nucleic acid-binding, OB-fold-like protein ",RPA3A
327,AT1G76820,0.354870677,0.656921843,4.552954731,16.97244783,0.000206291,0.010931518, eukaryotic translation initiation factor 2 (eIF-2) family protein ,NA
328,AT5G10430,-0.476505201,-0.102746919,6.041657486,16.92869116,0.000210854,0.011139252, arabinogalactan protein 4 ,AGP4;ATAGP4;JAGGER
329,AT1G67750,0.57564247,-0.210185695,5.226360948,16.86167488,0.000218039,0.01148382, Pectate lyase family protein ,NA
330,AT5G52230,0.625077176,-0.225956073,3.652439978,16.8338827,0.00022109,0.011609227, methyl-CPG-binding domain protein 13 ,MBD13
331,AT5G52900,-0.125242624,-0.75056547,3.581894552,16.78105132,0.000227008,0.011858711, unknown protein; Has 30201 Blast hits to 17322 proteins in 780 species: Archae - 12; Bacteria - 1396; Metazoa - 17338; Fungi - 3422; Plants - 5037; Viruses - 0; Other Eukaryotes - 2996 (source: NCBI BLink). ,MAKR6
332,AT5G63810,-0.390051292,0.214469049,6.884925875,16.773506,0.000227866,0.011858711, beta-galactosidase 10 ,AtBGAL10;BGAL10
333,AT5G02490,0.538265645,-0.002792573,5.009389195,16.7732581,0.000227894,0.011858711, Heat shock protein 70 (Hsp 70) family protein ,AtHsp70-2;Hsp70-2
334,AT5G62990,-0.774143699,0.667025309,4.197683854,16.70319054,0.00023602,0.012244759, Ubiquitin carboxyl-terminal hydrolase family protein ,emb1692
335,AT3G25290,1.240528653,0.3034876,1.210487191,16.63512029,0.000244191,0.012630867, Auxin-responsive family protein ,NA
336,AT2G16570,0.593027682,0.479184843,2.394996952,16.59695221,0.000248896,0.012835913, GLN phosphoribosyl pyrophosphate amidotransferase 1 ,ASE1;ATASE;ATASE1
337,AT2G23120,-0.841898321,0.263353592,5.993319343,16.57944305,0.000251084,0.012910356," Late embryogenesis abundant protein, group 6 ",NA
338,AT1G61300,1.008891381,-0.390468496,4.340178255,16.52098739,0.000258531,0.013253937, LRR and NB-ARC domains-containing disease resistance protein ,NA
339,AT5G02760,-0.365669501,-0.37284597,3.810507918,16.49471363,0.00026195,0.013389587, Protein phosphatase 2C family protein ,APD7;SSPP
340,AT3G52040,-0.701515684,0.608939907,5.501153459,16.43339967,0.000270105,0.013749599, unknown protein; Has 37 Blast hits to 37 proteins in 15 species: Archae - 0; Bacteria - 0; Metazoa - 0; Fungi - 0; Plants - 37; Viruses - 0; Other Eukaryotes - 0 (source: NCBI BLink). ,NA
341,AT3G20130,0.467758807,0.732952944,1.997461789,16.42988427,0.00027058,0.013749599," cytochrome P450, family 705, subfamily A, polypeptide 22 ",CYP705A22;GPS1
342,AT2G32950,0.379071273,-0.185164892,5.212332416,16.42381286,0.000271403,0.013751076, Transducin/WD40 repeat-like superfamily protein ,ATCOP1;COP1;DET340;EMB168;FUS1
343,AT1G44350,-0.963135799,-0.151692173,1.922477371,16.40652322,0.000273759,0.013830028, IAA-leucine resistant (ILR)-like gene 6 ,ILL6
344,AT4G08150,0.842170262,-0.477786504,3.321071912,16.31782362,0.000286174,0.014415165, KNOTTED-like from Arabidopsis thaliana ,BP;BP1;KNAT1
345,AT1G70420,-0.756874312,0.254639345,4.881285912,16.29459442,0.000289517,0.014528578, Protein of unknown function (DUF1645) ,NA
346,AT3G59820,-0.397765377,0.281522763,7.506977345,16.2905557,0.000290102,0.014528578, LETM1-like protein ,AtLETM1;LETM1
347,AT3G10530,-0.4172073,0.064001797,6.836443046,16.27738435,0.000292019,0.014582429, Transducin/WD40 repeat-like superfamily protein ,NA
348,AT1G76300,-0.36025601,0.130481267,6.693689545,16.18725694,0.000305479,0.015172922, snRNP core protein SMD3 ,SmD3
349,AT3G49110,1.063045563,-0.469554251,5.424621015,16.18649981,0.000305595,0.015172922, peroxidase CA ,ATPCA;ATPRX33;PRX33;PRXCA
350,AT4G37090,-0.425238656,-0.003404811,5.001249427,16.15343472,0.000310689,0.015381781, unknown protein; FUNCTIONS IN: molecular_function unknown; INVOLVED IN: biological_process unknown; LOCATED IN: cellular_component unknown; EXPRESSED IN: 23 plant structures; EXPRESSED DURING: 13 growth stages; Has 30201 Blast hits to 17322 proteins in 780 species: Archae - 12; Bacteria - 1396; Metazoa - 17338; Fungi - 3422; Plants - 5037; Viruses - 0; Other Eukaryotes - 2996 (source: NCBI BLink). ,NA
351,AT1G04650,0.768443955,0.12274799,2.530075567,16.10911124,0.000317652,0.015681668, unknown protein; Has 30201 Blast hits to 17322 proteins in 780 species: Archae - 12; Bacteria - 1396; Metazoa - 17338; Fungi - 3422; Plants - 5037; Viruses - 0; Other Eukaryotes - 2996 (source: NCBI BLink). ,FLIP
352,AT3G54500,0.63363822,-0.128802982,7.247319252,16.09153891,0.000320455,0.015775114, FUNCTIONS IN: molecular_function unknown; INVOLVED IN: biological_process unknown; LOCATED IN: cellular_component unknown; EXPRESSED IN: 22 plant structures; EXPRESSED DURING: 13 growth stages; BEST Arabidopsis thaliana protein match is: dentin sialophosphoprotein-related (TAIR:AT5G64170.1). ,LNK2
353,AT5G56100,-0.672547394,0.253460529,4.931979842,16.06576217,0.000324612,0.015934477, glycine-rich protein / oleosin ,NA
354,AT3G10300,0.627615924,-0.321762425,3.251011849,16.03989085,0.000328838,0.01609634, Calcium-binding EF-hand family protein ,NA
355,AT1G69780,0.18232595,0.388624006,4.180506826,16.02239136,0.000331728,0.016192056, Homeobox-leucine zipper protein family ,ATHB13
356,AT4G39960,-0.328513873,0.034373303,8.502368919,15.99616652,0.000336106,0.016359688, Molecular chaperone Hsp40/DnaJ family protein ,DJA5
357,AT3G47860,-0.31750753,0.051991708,6.030275231,15.98231975,0.000338441,0.016427202, chloroplastic lipocalin ,CHL;LCNP
358,AT2G43590,0.660964129,-0.24107544,4.121812254,15.93703763,0.000346191,0.016712331, Chitinase family protein ,NA
359,AT3G61920,-0.993678474,-0.029861247,2.470159696,15.933707,0.000346768,0.016712331," unknown protein; FUNCTIONS IN: molecular_function unknown; INVOLVED IN: N-terminal protein myristoylation; LOCATED IN: cellular_component unknown; EXPRESSED IN: shoot, hypocotyl, root, egg cell; BEST Arabidopsis thaliana protein match is: unknown protein (TAIR:AT1G64700.1); Has 77 Blast hits to 77 proteins in 8 species: Archae - 0; Bacteria - 0; Metazoa - 0; Fungi - 0; Plants - 77; Viruses - 0; Other Eukaryotes - 0 (source: NCBI BLink). ",NA
360,AT3G02832,-1.229742739,0.111797374,1.929818849,15.93116676,0.000347209,0.016712331,  ,NA
361,AT1G13410,-0.75324794,0.049850256,2.405270135,15.9209083,0.000348995,0.01675174, Tetratricopeptide repeat (TPR)-like superfamily protein ,NA
362,AT4G10120,0.974153804,-0.201202961,3.143098892,15.8814479,0.000355949,0.01703834, Sucrose-phosphate synthase family protein ,ATSPS4F;SPS4F
363,AT5G40370,-0.574989141,-0.001442513,4.015826717,15.85809126,0.00036013,0.017190996, Glutaredoxin family protein ,AtGRXC2;GRX370;GRXC2
364,AT4G37610,-1.109514021,1.811617897,2.600109339,15.83290315,0.000364694,0.017361043, BTB and TAZ domain protein 5 ,BT5
365,AT3G05160,-0.679796293,0.569420625,4.248768153,15.81156061,0.000368607,0.017499225, Major facilitator superfamily protein ,NA
366,AT5G35180,0.479819463,-0.193925985,5.726695916,15.75566815,0.000379053,0.017945993, Protein of unknown function (DUF1336) ,NA
367,AT5G10180,-0.410539916,-0.136625472,6.00198076,15.71888081,0.00038609,0.018229333, slufate transporter 2;1 ,AST68;SULTR2;1
368,AT5G20250,-0.814341308,0.383461124,4.721083436,15.65736396,0.00039815,0.018747667, Raffinose synthase family protein ,DIN10;RS6
369,AT5G61030,-0.415957172,0.098568717,8.022557553,15.63684027,0.000402257,0.018889713, glycine-rich RNA-binding protein 3 ,GR-RBP3;ORRM3;RBGA7
370,AT4G08380,1.274860254,0.40206762,1.881399328,15.62315358,0.000405019,0.018968021, Proline-rich extensin-like family protein ,NA
371,AT1G13400,-1.928724964,0.741554495,0.812757352,15.61185286,0.000407314,0.019024084, C2H2 and C2HC zinc fingers superfamily protein ,JGL;NUB
372,AT3G02790,-0.492722882,0.139627937,4.734318725,15.60186515,0.000409353,0.019067929, zinc finger (C2H2 type) family protein ,MBS1
373,AT5G24800,-0.375136436,-0.200953559,4.013838423,15.57961606,0.000413932,0.019229543, basic leucine zipper 9 ,ATBZIP9;BZIP9;BZO2H2
374,AT2G31380,0.453805741,-0.211387036,4.649506075,15.56347473,0.000417287,0.019262033, salt tolerance homologue ,BBX25;STH
375,AT5G58730,0.599858286,-0.216099882,3.616478032,15.55325441,0.000419424,0.019262033, pfkB-like carbohydrate kinase family protein ,Mik
376,AT5G40690,-1.318739195,-0.064917091,1.333011637,15.55120787,0.000419854,0.019262033," CONTAINS InterPro DOMAIN/s: EF-Hand 1, calcium-binding site (InterPro:IPR018247); BEST Arabidopsis thaliana protein match is: unknown protein (TAIR:AT2G41730.1); Has 1807 Blast hits to 1807 proteins in 277 species: Archae - 0; Bacteria - 0; Metazoa - 736; Fungi - 347; Plants - 385; Viruses - 0; Other Eukaryotes - 339 (source: NCBI BLink). ",NA
377,AT5G18360,1.351461735,-0.591664435,1.651716602,15.54906685,0.000420304,0.019262033, Disease resistance protein (TIR-NBS-LRR class) family ,NA
378,AT1G67120,-0.472012241,0.270942998,8.448140453,15.54805559,0.000420516,0.019262033, ATPases;nucleotide binding;ATP binding;nucleoside-triphosphatases;transcription factor binding ,AtMDN1;MDN1
379,AT1G34245,-0.749378014,0.035576879,2.590031827,15.54432414,0.000421301,0.019262033, Putative membrane lipoprotein ,EPF2
380,AT1G26530,-2.478923029,1.85421865,0.974323004,15.52633122,0.000425109,0.019384958, PIN domain-like family protein ,NA
381,AT2G47490,0.514947572,-0.101201233,3.527144655,15.49783098,0.00043121,0.019611564, NAD+ transporter 1 ,ATNDT1;NDT1
382,AT3G15410,0.244859384,0.256228859,4.300588176,15.48273911,0.000434476,0.019708383, Leucine-rich repeat (LRR) family protein ,NA
383,AT5G01810,0.377160957,0.091659147,6.158909388,15.45195098,0.000441216,0.019961866, CBL-interacting protein kinase 15 ,ATPK10;CIPK15;PKS3;SIP2;SNRK3.1
384,AT1G13080,0.658943329,-0.292397213,2.916689829,15.43953931,0.000443963,0.020033824," cytochrome P450, family 71, subfamily B, polypeptide 2 ",CYP71B2
385,AT5G27330,-0.543641495,0.379921891,8.699761618,15.40087661,0.000452629,0.020332872, Prefoldin chaperone subunit family protein ,NA
386,AT1G73600,0.894125475,-0.328205917,6.864942432,15.39725395,0.000453449,0.020332872, S-adenosyl-L-methionine-dependent methyltransferases superfamily protein ,AtPMT3;NMT;NMT3
387,AT2G18440,0.213052237,0.187479924,6.88965801,15.39434129,0.00045411,0.020332872, GUT15 (GENE WITH UNSTABLE TRANSCRIPT 15); other RNA ,GUT15;sORF20
388,AT3G53800,-0.380684225,-0.013966312,5.262843913,15.37057549,0.000459539,0.020522896, Fes1B ,Fes1B
389,AT2G33540,0.341313895,0.034254831,5.230581841,15.33198951,0.00046849,0.020868903, C-terminal domain phosphatase-like 3 ,ATCPL3;CPL3
390,AT5G48250,-0.652857287,0.476822372,4.39420991,15.31320195,0.000472912,0.020974559, B-box type zinc finger protein with CCT domain ,BBX8
391,AT1G51380,-0.816099515,-0.203128195,2.540744059,15.30890853,0.000473928,0.020974559, DEA(D/H)-box RNA helicase family protein ,NA
392,AT5G51460,-0.554382123,0.237513347,4.944940412,15.30652435,0.000474494,0.020974559, Haloacid dehalogenase-like hydrolase (HAD) superfamily protein ,ATTPPA;TPPA
393,AT3G23640,0.444029628,0.065650368,5.051062709,15.27861643,0.000481161,0.021215169, heteroglycan glucosidase 1 ,HGL1
394,AT2G15400,2.589045003,-2.003151367,0.530439683,15.27087229,0.000483028,0.02124342, DNA-directed RNA polymerase family protein ,NRPE3B;RBP36B
395,AT3G23480,-1.841578072,0.59245374,1.408505728,15.2509723,0.000487858,0.021401528, Cyclopropane-fatty-acyl-phospholipid synthase ,NA
396,AT3G01890,-0.395358641,-0.622590049,2.447891182,15.20422975,0.000499394,0.021852278, SWIB/MDM2 domain superfamily protein ,SWP73A
397,AT1G67900,-0.013346877,-0.522789489,5.849481694,15.18732249,0.000503634,0.021982281, Phototropic-responsive NPH3 family protein ,NA
398,AT5G21940,-0.520689468,-0.279603718,4.227427525,15.17309223,0.00050723,0.022031901, unknown protein; BEST Arabidopsis thaliana protein match is: unknown protein (TAIR:AT3G43850.1); Has 30201 Blast hits to 17322 proteins in 780 species: Archae - 12; Bacteria - 1396; Metazoa - 17338; Fungi - 3422; Plants - 5037; Viruses - 0; Other Eukaryotes - 2996 (source: NCBI BLink). ,NA
399,AT3G28500,1.026849521,1.199753624,0.855979689,15.17276278,0.000507314,0.022031901, 60S acidic ribosomal protein family ,NA
400,AT2G22240,0.501865577,-0.07819834,4.847903813,15.1306711,0.000518103,0.022393038, myo-inositol-1-phosphate synthase 2 ,ATIPS2;ATMIPS2;MIPS2
401,AT5G24580,-0.58717719,0.594846444,4.952366493,15.13024543,0.000518214,0.022393038, Heavy metal transport/detoxification superfamily protein  ,NA
402,AT3G57010,0.400679806,0.292160708,3.004884791,15.09782977,0.000526681,0.022702323, Calcium-dependent phosphotriesterase superfamily protein ,NA
403,AT1G11840,0.23827348,0.066905216,7.252951565,15.08011324,0.000531368,0.022847485, glyoxalase I homolog ,ATGLX1;AtGLYI3;GLX1
404,AT3G55690,-0.343583689,-0.293706967,3.448089704,15.03641814,0.000543104,0.023294337, unknown protein; BEST Arabidopsis thaliana protein match is: unknown protein (TAIR:AT2G39870.1); Has 76 Blast hits to 69 proteins in 15 species: Archae - 0; Bacteria - 0; Metazoa - 4; Fungi - 3; Plants - 69; Viruses - 0; Other Eukaryotes - 0 (source: NCBI BLink). ,NA
405,AT5G14580,-0.641911708,0.169440788,4.877097083,15.02638135,0.000545837,0.023343268," polyribonucleotide nucleotidyltransferase, putative ",NA
406,AT1G15950,0.409250773,-0.064573374,5.743360382,15.02234495,0.000546939,0.023343268, cinnamoyl coa reductase 1 ,ATCCR1;CCR1;IRX4
407,AT1G76930,1.117866169,-0.348267686,5.936135262,14.99197927,0.000555307,0.023642157, extensin 4 ,ATEXT1;ATEXT4;EXT1;EXT4;ORG5
408,AT2G38995,-0.459172002,0.002130773,4.074528339,14.9754216,0.000559923,0.023780271, O-acyltransferase (WSD1-like) family protein ,NA
409,AT3G01520,-0.819208317,0.849500999,3.353317401,14.94111027,0.000569612,0.024132608, Adenine nucleotide alpha hydrolases-like superfamily protein ,NA
410,AT4G33467,-2.083645241,0.596727902,0.810684822,14.93019459,0.000572729,0.024205498, unknown protein; Has 25 Blast hits to 25 proteins in 9 species: Archae - 0; Bacteria - 0; Metazoa - 0; Fungi - 0; Plants - 25; Viruses - 0; Other Eukaryotes - 0 (source: NCBI BLink). ,NA
411,AT1G23935,0.926074199,-0.757576735,3.286494909,14.90895395,0.000578844,0.024404415, CONTAINS InterPro DOMAIN/s: Apoptosis inhibitory 5 (InterPro:IPR008383); BEST Arabidopsis thaliana protein match is: unknown protein (TAIR:AT3G19515.2); Has 219 Blast hits to 219 proteins in 67 species: Archae - 0; Bacteria - 0; Metazoa - 128; Fungi - 0; Plants - 77; Viruses - 0; Other Eukaryotes - 14 (source: NCBI BLink). ,NA
412,AT2G19870,-0.326910251,0.039411789,7.19820194,14.89244601,0.000583642,0.024542615, tRNA/rRNA methyltransferase (SpoU) family protein ,NA
413,AT3G02360,0.405113954,-0.195704643,5.916819989,14.88795131,0.000584955,0.024542615, 6-phosphogluconate dehydrogenase family protein ,PGD2
414,AT3G52550,-0.54499333,-0.474696484,2.710991227,14.86330379,0.000592208,0.024786927, BEST Arabidopsis thaliana protein match is: ovate family protein 18 (TAIR:AT3G52540.1); Has 5496 Blast hits to 1338 proteins in 151 species: Archae - 0; Bacteria - 23; Metazoa - 3754; Fungi - 379; Plants - 301; Viruses - 154; Other Eukaryotes - 885 (source: NCBI BLink). ,NA
415,AT5G37300,0.665755382,0.155484246,2.724620969,14.8566305,0.000594188,0.024809843, O-acyltransferase (WSD1-like) family protein ,WSD1
416,AT1G25250,0.511474665,0.126369466,2.582657015,14.85151212,0.00059571,0.024813626, indeterminate(ID)-domain 16 ,AtIDD16;IDD16
417,AT1G31690,-0.379477082,-0.145426697,5.441525388,14.84143208,0.00059872,0.024879197, Copper amine oxidase family protein ,NA
418,AT4G00165,-0.47365871,-0.104188564,4.451088064,14.79996276,0.000611264,0.025339677, Bifunctional inhibitor/lipid-transfer protein/seed storage 2S albumin superfamily protein ,NA
419,AT4G11690,-0.809100516,0.480082278,2.87724522,14.78900364,0.000614623,0.0254181, Pentatricopeptide repeat (PPR-like) superfamily protein ,ABO8
420,AT4G00895,-0.295408974,-0.061449801,6.721150746,14.77868596,0.000617802,0.025488734," ATPase, F1 complex, OSCP/delta subunit protein ",NA
421,AT1G24625,-0.476400287,0.060904826,4.642827089,14.77273406,0.000619643,0.025503977, zinc finger protein 7 ,ZFP7
422,AT5G10260,0.763129342,0.44476017,1.859943398,14.75800675,0.000624223,0.02563159, RAB GTPase homolog H1E ,AtRABH1e;RABH1e
423,AT3G45140,-0.2336313,-0.369828614,6.789111389,14.69744326,0.000643414,0.026357172, lipoxygenase 2 ,ATLOX2;LOX2
424,AT5G54810,-0.195131156,-0.161189915,7.107139737,14.68400313,0.000647753,0.026472309, tryptophan synthase beta-subunit 1 ,ATTSB1;TRP2;TRPB;TSB1
425,AT1G21310,0.63992527,0.065221135,7.809448223,14.65325898,0.000657787,0.026819134, extensin 3 ,ATEXT3;EXT3;RSH
426,AT5G61850,1.894669969,-1.141087089,1.50244685,14.64287755,0.00066121,0.026895423, floral meristem identity control protein LEAFY (LFY) ,LFY;LFY3
427,AT1G31770,0.729715328,-0.037356592,2.761948486,14.63119158,0.000665085,0.026989677, ATP-binding cassette 14 ,ABCG14;AtABCG14
428,AT5G09270,-0.745743758,0.788571151,3.922401311,14.57818179,0.000682949,0.027649846, unknown protein; Has 30201 Blast hits to 17322 proteins in 780 species: Archae - 12; Bacteria - 1396; Metazoa - 17338; Fungi - 3422; Plants - 5037; Viruses - 0; Other Eukaryotes - 2996 (source: NCBI BLink). ,NA
429,AT5G47650,0.792596845,-0.218933882,2.723972768,14.51060726,0.000706418,0.028533353, nudix hydrolase homolog 2 ,ATNUDT2;ATNUDX2;NUDT2
430,AT5G58350,0.764068129,-0.241370455,2.713124883,14.50050097,0.000709997,0.028611209, with no lysine (K) kinase 4 ,WNK4;ZIK2
431,AT5G66860,-0.483707908,0.014417569,5.093082231,14.48938548,0.000713953,0.028703912," Ribosomal protein L25/Gln-tRNA synthetase, anti-codon-binding domain ",NA
432,AT4G23680,0.953013524,1.346020055,0.903926632,14.46067483,0.000724276,0.029051533, Polyketide cyclase/dehydrase and lipid transport superfamily protein ,NA
433,AT5G39790,-0.653545664,0.704818068,3.913780738,14.44871081,0.000728622,0.029158344, 5'-AMP-activated protein kinase-related ,PTST
434,AT5G24470,-0.573451356,0.115788486,6.067120224,14.42518816,0.000737242,0.029435329, pseudo-response regulator 5 ,APRR5;PRR5
435,AT2G41220,0.352189611,-0.096637218,6.163615113,14.41697486,0.000740276,0.029488513, glutamate synthase 2 ,GLU2
436,AT3G51310,0.243307494,0.051635909,5.759230849,14.3913092,0.000749837,0.029800865, VPS35 homolog C ,VPS35C
437,AT1G22770,-0.28094559,-0.091759101,6.201597322,14.36695245,0.000759025,0.03009698, gigantea protein (GI) ,FB;GI
438,AT4G19380,-0.531509798,-0.118927599,4.233708861,14.35189459,0.000764761,0.030217847, Long-chain fatty alcohol dehydrogenase family protein ,NA
439,AT5G42060,-0.655518549,0.069341645,4.108997625,14.34980425,0.000765561,0.030217847," DEK, chromatin associated protein ",NA
440,AT2G01870,-0.56704311,0.007935575,3.775671812,14.32466291,0.000775245,0.030530558," unknown protein; FUNCTIONS IN: molecular_function unknown; INVOLVED IN: biological_process unknown; LOCATED IN: chloroplast thylakoid membrane, chloroplast; EXPRESSED IN: 22 plant structures; EXPRESSED DURING: 13 growth stages; Has 11 Blast hits to 11 proteins in 5 species: Archae - 0; Bacteria - 0; Metazoa - 0; Fungi - 0; Plants - 11; Viruses - 0; Other Eukaryotes - 0 (source: NCBI BLink). ",NA
441,AT2G45860,-0.589199101,0.443018083,6.125554697,14.31818228,0.000777761,0.030560192, unknown protein; Has 32 Blast hits to 32 proteins in 13 species: Archae - 0; Bacteria - 0; Metazoa - 0; Fungi - 0; Plants - 32; Viruses - 0; Other Eukaryotes - 0 (source: NCBI BLink). ,NA
442,AT1G48100,0.599097294,0.116846202,3.549516687,14.28908819,0.000789158,0.030937848, Pectin lyase-like superfamily protein ,PGX3
443,AT1G02370,-0.443933642,-0.001945716,4.296189406,14.27286205,0.000795586,0.031119463, Tetratricopeptide repeat (TPR)-like superfamily protein ,NA
444,AT3G43980,-0.634319386,0.355203648,8.715507087,14.26198584,0.000799925,0.031218684, Ribosomal protein S14p/S29e family protein ,NA
445,AT5G50580,-5.982138019,11.72859431,0.980889491,14.22638947,0.000814289,0.03170788, SUMO-activating enzyme 1B ,AT-SAE1-2;SAE1B
446,AT3G21770,0.020738261,1.238036301,2.745812445,14.21209592,0.00082013,0.031793436, Peroxidase superfamily protein ,NA
447,AT3G29590,-0.92380924,0.391401529,2.633740477,14.21203162,0.000820156,0.031793436, HXXXD-type acyl-transferase family protein ,AT5MAT
448,AT5G62280,0.130148575,-1.524096959,1.838247149,14.19664734,0.000826489,0.031967423, Protein of unknown function (DUF1442) ,NA
449,AT2G07687,2.634177737,-3.508490122,3.191347099,14.17444885,0.000835714,0.032252222," Cytochrome c oxidase, subunit III ",NA
450,AT4G18750,-0.501436692,0.229843175,4.96083402,14.14407938,0.000848501,0.032554796, Pentatricopeptide repeat (PPR) superfamily protein ,DOT4
451,AT1G16000,-0.585183834,0.58602867,5.483237634,14.1419041,0.000849424,0.032554796, unknown protein; BEST Arabidopsis thaliana protein match is: unknown protein (TAIR:AT1G80890.1); Has 41 Blast hits to 40 proteins in 10 species: Archae - 0; Bacteria - 0; Metazoa - 0; Fungi - 0; Plants - 41; Viruses - 0; Other Eukaryotes - 0 (source: NCBI BLink). ,NA
452,AT5G08620,-0.213748528,-0.230640993,5.642668378,14.14014374,0.000850172,0.032554796, DEA(D/H)-box RNA helicase family protein ,ATRH25;STRS2
453,AT3G59670,-0.477993057,0.420961284,6.289243346,14.13803483,0.000851069,0.032554796, unknown protein; BEST Arabidopsis thaliana protein match is: unknown protein (TAIR:AT4G37440.2); Has 77 Blast hits to 77 proteins in 14 species: Archae - 0; Bacteria - 0; Metazoa - 0; Fungi - 0; Plants - 73; Viruses - 0; Other Eukaryotes - 4 (source: NCBI BLink). ,NA
454,AT1G22890,-0.500671764,-0.244198723,4.461992448,14.12003938,0.000858761,0.032776682, unknown protein; FUNCTIONS IN: molecular_function unknown; INVOLVED IN: biological_process unknown; LOCATED IN: endomembrane system; EXPRESSED IN: 19 plant structures; EXPRESSED DURING: 11 growth stages; Has 17 Blast hits to 17 proteins in 2 species: Archae - 0; Bacteria - 0; Metazoa - 0; Fungi - 0; Plants - 17; Viruses - 0; Other Eukaryotes - 0 (source: NCBI BLink). ,NA
455,AT1G43560,-0.479622105,0.236135281,4.970423056,14.0435515,0.00089224,0.033979625, thioredoxin Y2 ,Aty2;ty2
456,AT4G24540,0.336816689,0.022454567,5.678064912,14.01403534,0.000905505,0.034409193, AGAMOUS-like 24 ,AGL24
457,AT1G30820,-0.578082504,0.209165328,5.616933224,13.98106138,0.000920558,0.034904654, CTP synthase family protein ,NA
458,AT3G10450,0.667164,-0.10476901,2.868682654,13.95073296,0.000934624,0.035360613, serine carboxypeptidase-like 7 ,SCPL7
459,AT1G31710,-0.332908316,-0.163583084,4.387775156,13.94169157,0.000938858,0.035443442, Copper amine oxidase family protein ,NA
460,AT1G48570,-0.314694124,-0.099046792,6.234777271,13.93239524,0.000943233,0.035522259, zinc finger (Ran-binding) family protein ,NA
461,AT3G23620,-0.329973366,-0.003133748,6.041483836,13.92855337,0.000945046,0.035522259, Ribosomal RNA processing Brix domain protein ,NA
462,AT3G03300,0.628662088,-0.33643474,3.97907403,13.91255684,0.000952635,0.035730009, dicer-like 2 ,ATDCL2;DCL2
463,AT1G61740,0.314990613,0.068590886,5.987428544,13.89956622,0.000958843,0.035885169, Sulfite exporter TauE/SafE family protein ,NA
464,AT1G20450,-0.600348331,0.388547609,7.748329935,13.88002629,0.000968257,0.036159386, Dehydrin family protein ,ERD10;LTI29;LTI45
465,AT3G56680,-0.240925046,-0.046113965,6.243637525,13.87474354,0.000970818,0.036174983, Single-stranded nucleic acid binding R3H protein ,NA
466,AT5G13320,-1.876509234,0.884160512,0.918688345,13.87056162,0.00097285,0.036174983, Auxin-responsive GH3 family protein ,AtGH3.12;GDG1;GH3.12;PBS3;WIN3
467,AT5G51100,-0.355345478,0.026075397,5.800641833,13.86427643,0.000975912,0.036211139, Fe superoxide dismutase 2 ,FSD2
468,AT4G32770,0.643303846,-0.210337534,4.666554836,13.82871298,0.000993421,0.036782032," tocopherol cyclase, chloroplast / vitamin E deficient 1 (VTE1) / sucrose export defective 1 (SXD1) ",ATSDX1;VTE1
469,AT2G25210,-0.432900663,0.126336351,6.253219631,13.8199158,0.0009978,0.036865405, Ribosomal protein L39 family protein ,NA
470,AT2G14880,-0.357218932,0.047501232,7.350362332,13.81441722,0.001000547,0.036888245, SWIB/MDM2 domain superfamily protein ,SWIB2
471,AT2G01755,-0.347897777,-0.354784409,4.405019079,13.76708878,0.001024506,0.037691393, unknown protein; FUNCTIONS IN: molecular_function unknown; INVOLVED IN: biological_process unknown; LOCATED IN: chloroplast; Has 120 Blast hits to 120 proteins in 52 species: Archae - 0; Bacteria - 80; Metazoa - 0; Fungi - 0; Plants - 24; Viruses - 0; Other Eukaryotes - 16 (source: NCBI BLink). ,NA
472,AT1G78210,-0.475566113,0.260380852,4.588929023,13.75297559,0.001031761,0.037877886, alpha/beta-Hydrolases superfamily protein ,NA
473,AT2G20450,-0.444885772,0.183837669,9.436492017,13.74534057,0.001035708,0.037942376, Ribosomal protein L14 ,NA
474,AT5G17990,-0.165026258,-0.206223367,6.407939589,13.7357265,0.001040698,0.038044772, tryptophan biosynthesis 1 ,pat1;TRP1
475,AT2G36145,0.521249433,-0.122037077,6.175337345,13.72833384,0.001044552,0.038105267," unknown protein; FUNCTIONS IN: molecular_function unknown; INVOLVED IN: biological_process unknown; LOCATED IN: chloroplast thylakoid membrane, chloroplast stroma, chloroplast; EXPRESSED IN: 19 plant structures; EXPRESSED DURING: 13 growth stages; Has 49 Blast hits to 49 proteins in 17 species: Archae - 0; Bacteria - 0; Metazoa - 0; Fungi - 0; Plants - 49; Viruses - 0; Other Eukaryotes - 0 (source: NCBI BLink). ",NA
476,AT1G48460,-0.420052018,0.097472044,4.285789892,13.72233964,0.001047688,0.038139351, unknown protein; FUNCTIONS IN: molecular_function unknown; INVOLVED IN: biological_process unknown; LOCATED IN: chloroplast envelope; EXPRESSED IN: 21 plant structures; EXPRESSED DURING: 13 growth stages; BEST Arabidopsis thaliana protein match is: unknown protein (TAIR:AT5G63040.1); Has 60 Blast hits to 60 proteins in 14 species: Archae - 0; Bacteria - 0; Metazoa - 0; Fungi - 0; Plants - 60; Viruses - 0; Other Eukaryotes - 0 (source: NCBI BLink). ,NA
477,AT5G46490,0.402622371,0.348650132,2.733828547,13.70309614,0.001057817,0.038427359, Disease resistance protein (TIR-NBS-LRR class) family ,NA
478,AT3G57830,0.547150152,-0.596509978,4.682907801,13.66575518,0.001077752,0.039069649, Leucine-rich repeat protein kinase family protein ,NA
479,AT5G66960,-0.072756457,-0.568325485,4.122236919,13.59109892,0.001118743,0.04047094, Prolyl oligopeptidase family protein ,NA
480,AT3G23820,-0.343081542,0.124638793,6.800047891,13.57441108,0.001128117,0.040691566, UDP-D-glucuronate 4-epimerase 6 ,GAE6
481,AT3G53460,-0.247647549,-0.075166354,11.5649369,13.57189226,0.001129539,0.040691566, chloroplast RNA-binding protein 29 ,CP29
482,AT3G16150,0.851797253,-0.088039352,2.413197378,13.55321536,0.001140136,0.040988128, N-terminal nucleophile aminohydrolases (Ntn hydrolases) superfamily protein ,ASPGB1
483,AT3G03020,0.763225357,-0.020093223,2.093999845,13.5470758,0.001143641,0.041029023, unknown protein; FUNCTIONS IN: molecular_function unknown; INVOLVED IN: biological_process unknown; LOCATED IN: chloroplast; EXPRESSED IN: 21 plant structures; EXPRESSED DURING: 13 growth stages; Has 5 Blast hits to 5 proteins in 1 species: Archae - 0; Bacteria - 0; Metazoa - 0; Fungi - 0; Plants - 5; Viruses - 0; Other Eukaryotes - 0 (source: NCBI BLink). ,NA
484,AT3G44380,-0.399973695,-0.223208166,3.182348791,13.539184,0.001148163,0.041106133, Late embryogenesis abundant (LEA) hydroxyproline-rich glycoprotein family ,NA
485,AT3G12810,0.354982389,-0.137560581,6.004716984,13.53242292,0.001152051,0.041160288, SNF2 domain-containing protein / helicase domain-containing protein ,chr13;PIE1;SRCAP
486,AT3G09720,-0.49207003,0.190272191,4.54936768,13.51058406,0.0011647,0.041526575, P-loop containing nucleoside triphosphate hydrolases superfamily protein ,AtRH57;RH57
487,AT1G67080,0.419760725,-0.027973051,5.414947059,13.44490867,0.001203581,0.042824732, abscisic acid (aba)-deficient 4 ,ABA4
488,AT4G16700,-0.568628492,0.060058487,3.692667817,13.43425541,0.001210009,0.042965228, phosphatidylserine decarboxylase 1 ,PSD1
489,AT3G22450,-1.225228694,0.352296782,1.852822609,13.42236085,0.001217226,0.043093184, Ribosomal L18p/L5e family protein ,NA
490,AT5G23060,0.306708131,-0.081432515,6.773843732,13.42012802,0.001218586,0.043093184, calcium sensing receptor ,CaS
491,AT3G16500,0.105778003,0.27849431,5.417277193,13.40894764,0.001225417,0.0432465, phytochrome-associated protein 1 ,IAA26;PAP1
492,AT3G11020,-0.554084561,-0.093036593,3.104697296,13.39005626,0.001237047,0.043568194, DRE/CRT-binding protein 2B ,DREB2;DREB2B
493,AT1G53885,-5.285239724,10.52638073,0.521086834,13.34243373,0.001266856,0.044527555, Protein of unknown function (DUF581) ,NA
494,AT1G69570,2.266387369,-2.926534025,0.872906233,13.33038216,0.001274513,0.044631285, Dof-type zinc finger DNA-binding family protein ,CDF5
495,AT4G07960,-0.686496829,0.160255708,3.579536019,13.32968285,0.001274959,0.044631285, Cellulose-synthase-like C12 ,ATCSLC12;CSLC12
496,AT5G38040,-0.657735293,0.737165662,3.128689844,13.31546849,0.001284052,0.044858993, UDP-Glycosyltransferase superfamily protein ,NA
497,AT4G21534,1.232597124,-1.414539506,1.940572742,13.29182723,0.001299321,0.045301068, Diacylglycerol kinase family protein ,SPHK2
498,AT1G26940,0.924163205,-0.736520834,2.7367837,13.27876792,0.001307833,0.045486852, Cyclophilin-like peptidyl-prolyl cis-trans isomerase family protein ,NA
499,AT5G64360,0.04153962,0.471334837,4.683036805,13.27560968,0.0013099,0.045486852, Chaperone DnaJ-domain superfamily protein ,EIP9
500,AT5G57123,-0.705864778,0.326577063,4.029185671,13.26839045,0.001314636,0.045560036, unknown protein; BEST Arabidopsis thaliana protein match is: unknown protein (TAIR:AT4G29905.1); Has 30201 Blast hits to 17322 proteins in 780 species: Archae - 12; Bacteria - 1396; Metazoa - 17338; Fungi - 3422; Plants - 5037; Viruses - 0; Other Eukaryotes - 2996 (source: NCBI BLink). ,NA
501,AT3G07320,0.302347703,-0.00773893,6.965756306,13.22810445,0.001341386,0.046350173, O-Glycosyl hydrolases family 17 protein ,NA
502,AT3G33009,-1.27330879,-3.332110907,1.031238266,13.22601821,0.001342785,0.046350173, transposable element gene ,NA
503,AT3G06080,0.026729788,0.418236501,5.031739679,13.2066896,0.001355825,0.046707244, Plant protein of unknown function (DUF828) ,TBL10
504,AT1G13380,-0.133960366,-0.376906341,4.415321596,13.19314025,0.001365042,0.046931442, Protein of unknown function (DUF1218) ,NA
505,AT2G33180,-0.448689753,0.003591728,4.706770143,13.18400485,0.001371291,0.047052942, unknown protein; FUNCTIONS IN: molecular_function unknown; INVOLVED IN: biological_process unknown; LOCATED IN: chloroplast stroma; EXPRESSED IN: 22 plant structures; EXPRESSED DURING: 13 growth stages; Has 57 Blast hits to 57 proteins in 22 species: Archae - 0; Bacteria - 8; Metazoa - 0; Fungi - 0; Plants - 35; Viruses - 0; Other Eukaryotes - 14 (source: NCBI BLink). ,NA
506,AT4G04750,-0.395225339,-0.34533848,3.297419264,13.17527997,0.001377287,0.047147521, Major facilitator superfamily protein ,NA
507,AT4G30650,-0.557193407,0.190223298,5.963639974,13.16687162,0.001383089,0.047147521, Low temperature and salt responsive protein family ,NA
508,AT1G65150,0.797045239,0.445478958,1.800777832,13.16640937,0.001383409,0.047147521, TRAF-like family protein ,NA
509,AT4G09040,-0.225947414,-0.128510878,7.531854755,13.16051831,0.00138749,0.047147521, RNA-binding (RRM/RBD/RNP motifs) family protein ,NA
510,AT4G34630,0.402714919,-0.038021284,5.240022894,13.16028419,0.001387652,0.047147521, unknown protein; Has 30 Blast hits to 30 proteins in 10 species: Archae - 0; Bacteria - 2; Metazoa - 0; Fungi - 0; Plants - 24; Viruses - 0; Other Eukaryotes - 4 (source: NCBI BLink). ,NA
511,AT3G50340,0.224367882,-0.890727492,4.088327701,13.15438981,0.001391748,0.047194141, unknown protein; BEST Arabidopsis thaliana protein match is: unknown protein (TAIR:AT5G67020.1); Has 128 Blast hits to 128 proteins in 39 species: Archae - 0; Bacteria - 46; Metazoa - 0; Fungi - 3; Plants - 76; Viruses - 0; Other Eukaryotes - 3 (source: NCBI BLink). ,NA
512,AT3G26115,-0.03571528,0.64551396,3.743019544,13.08582824,0.001440285,0.048744653, Pyridoxal-5'-phosphate-dependent enzyme family protein ,NA
513,AT1G21580,0.212388453,0.124802126,6.242638309,13.07764254,0.001446192,0.048849158, Zinc finger C-x8-C-x5-C-x3-H type family protein ,SOP1
514,AT1G54050,-0.586659182,0.30071435,4.114784689,13.05692822,0.001461248,0.049261698, HSP20-like chaperones superfamily protein ,NA
515,AT5G38430,-0.488589654,0.072717566,9.08370327,13.03964992,0.001473927,0.049518974, Ribulose bisphosphate carboxylase (small chain) family protein ,RBCS1B
516,AT1G29560,0.334921658,0.272122453,4.004684698,13.03874314,0.001474595,0.049518974, Zinc finger C-x8-C-x5-C-x3-H type family protein ,NA
517,AT1G16740,-0.586978173,0.949861302,5.576007412,13.01812924,0.001489873,0.049851062, Ribosomal protein L20 ,NA
518,AT1G52400,-0.308867825,-0.051482934,6.838912232,13.01763842,0.001490238,0.049851062, beta glucosidase 18 ,ATBG1;BGL1;BGLU18
